# Supplementary material for: Bacillus subtilis biofilm extends Caenorhabditis elegans longevity through downregulation of the insulin-like signalling pathway
Source: PubMed Central journal article supplement (PMC5290332; doi:10.1038/ncomms14332), 2017-01-30
Supplement: ncomms14332-s1.pdf [file ncomms14332-s1.pdf]

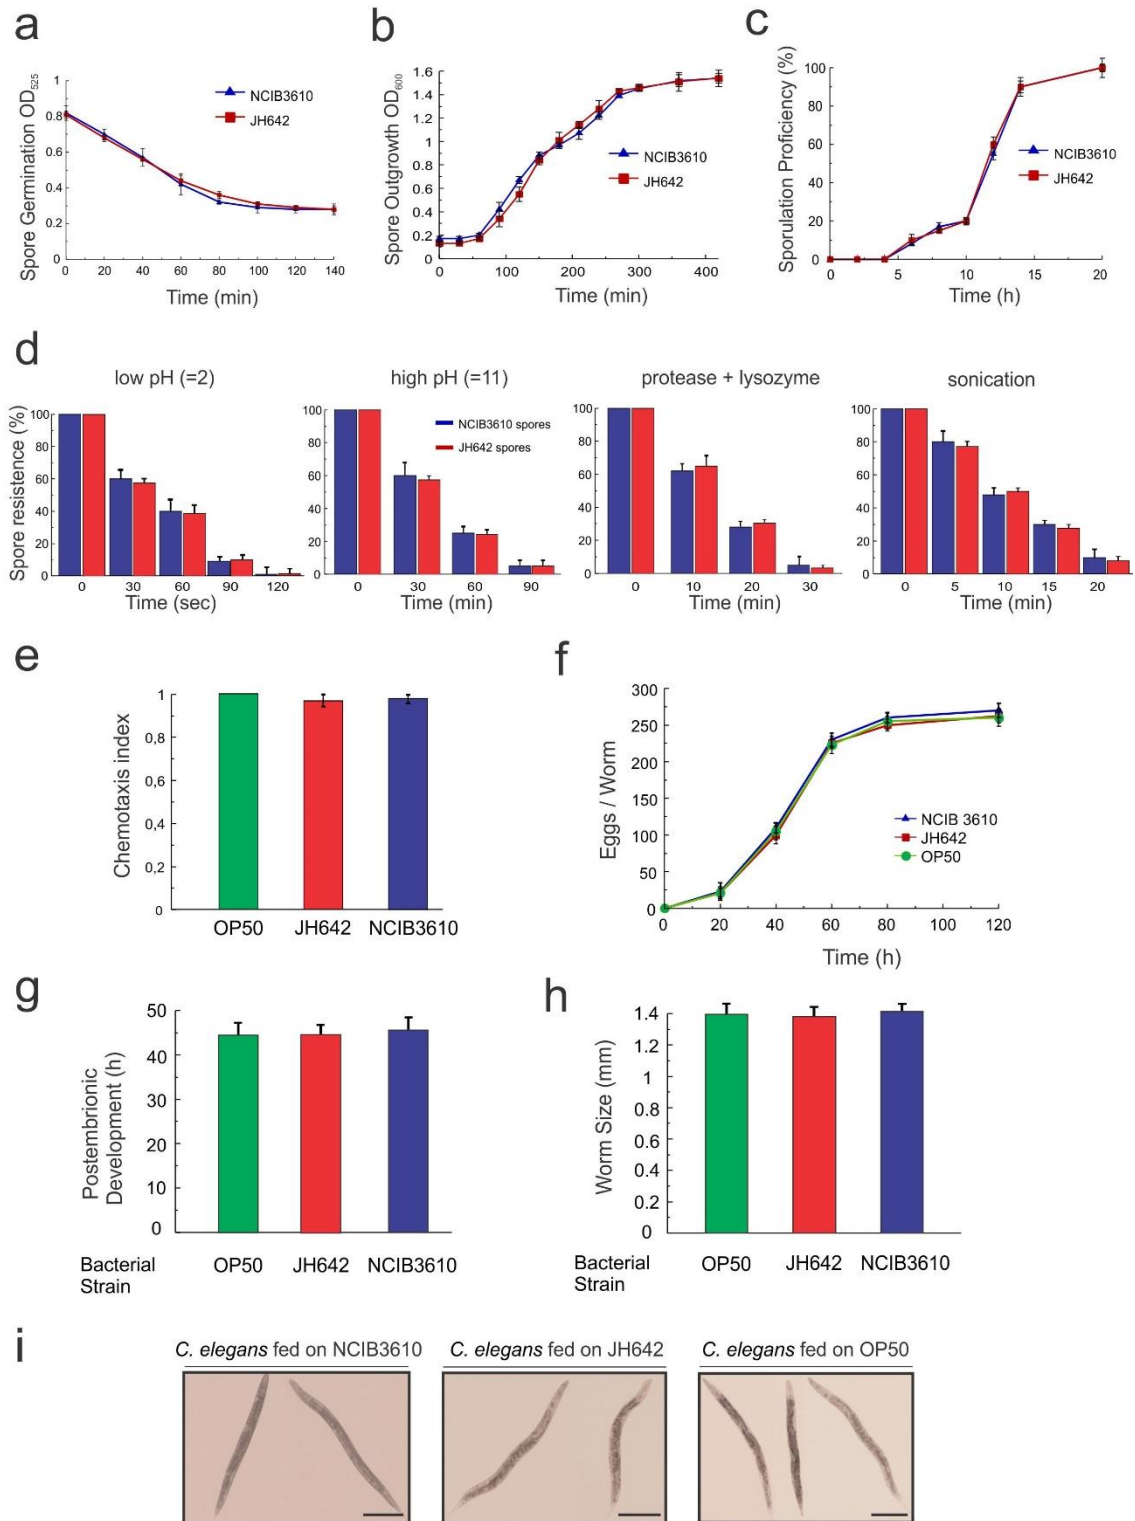

**Supplementary Figure 1. Physiological parameters of bacterial growth and worm growth are not affected in spite of the use of different spore types.** a) Germination rate of domesticated (JH642) and undomesticated (NCIB3610) *B. subtilis* spores in liquid NGM. Spore germination of JH642 (red squares) and NCIB3610 (blue triangles) *B. subtilis* was measured at 25 °C in presence of germination nutrients AFGK (10 mM L-alanine, 1 mM fructose, 1 mM glucose, and 10 mM potassium) as a decrease in optical density (loss of spore refractivity) at 525 nm. A representative experiment  $\pm$  SEM performed in triplicate is shown. b) Outgrowth of JH642 and NCIB3610 *B. subtilis* spores is not affected in liquid NGM. Spore outgrowth of JH642 (red squares) and NCIB3610 (blue triangles) *B. subtilis* was monitored at 600 nm. NGM was

supplemented with 0.5% glucose for the growth of both types of vegetative cells after spore germination plus 0.01% tryptophan and 0.01% phenylalanine for the growth of JH642 *B. subtilis*, after germination. A representative experiment  $\pm$  SEM performed in triplicate is shown. c) Sporulation proficiency of JH642 (red) and NCIB3610 (blue) cells<sup>44</sup> over growth at 25 °C in NGM broth. A representative experiment  $\pm$  SEM performed in triplicate is shown. d) Undomesticated and domesticated spores display similar physical, chemical and mechanic resistances against different stresses. Five milliliter of pure spore suspensions ( $1 \times 10^5$  CFU/mL) of the strains JH642 (domesticated) and NCIB3610 (undomesticated) were subjected to the different stresses shown in the graphs. Low and high pH values were reached with 1 M HCl and 0.5 M NaOH, respectively; protease + lysozyme treatment consisted of incubating the spores in the presence of proteinase K (1 mg/ml) plus lysozyme (1 mg/ml) and spore sonication was performed placing 0.2  $\mu$ m glass beads and spores in a tube and subjecting it to sonication in a Branson 1201 sonicating water bath at 60 W and 67 kHz. All treatments were incubated at 37 °C with gentle shaking (50 rpm), and at the time indicated in each graph, 0.5 ml of spore suspension was taken, washed, and spread on LB agar plates to quantify spore survival as indicated in the Methods. Percentage (%) of spore survival is relative to the value at time zero (100 % of survival) for each treatment. A representative experiment  $\pm$  SEM performed in triplicate is shown. e) Chemotactic behavior of N2 worms to *E. coli* or *B. subtilis* cells used as a food source. Briefly, age-synchronized late L4/young adult worms were transferred to plates containing 0.5 mm spots of OP50 *E. coli* or JH642 or NCIB3610 *B. subtilis*. The number of worms on each bacterial lawn was counted after 12 h of incubation at 20 °C, and the choice index was calculated as indicated in the “Methods”. The average of at least three independent experiments  $\pm$  SEM is shown. OP50 *E. coli* (green) was used as a control. f) *B. subtilis* strains do not alter the eggs laying rate or amount. Worms were fed either on JH642 (red squares) or NCIB3610 (blue triangles) *B. subtilis* and transferred twice a day to prevent overcrowding until egg laying ceased. The progeny was counted 3 days after parents were removed, and their numbers are shown as the mean  $\pm$  SEM from at least three experiments. OP50 *E. coli* (green circles) was used as a control. g) Domesticated and undomesticated *B. subtilis* do not affect postembryonic development. Eggs were allowed to hatch for 4 h and larvae were then placed individually on fresh NGM agar plates seeded with JH642 (red) or NCIB3610 (blue) *B. subtilis*. Worm growth was monitored every 5 h until they reached late L4/young adult stage. The mean number of h  $\pm$  SEM from at least three experiments is shown. OP50 *E. coli* (green) was used as a control. h, i) Domesticated and undomesticated *B. subtilis* do not affect worm size. Bar graph (h) shows the average length  $\pm$  SEM of 50 worms fed JH642 (red) or NCIB3610 (blue) *B. subtilis*. OP50 *E. coli* (green) was used as a control. (i) Worms were allowed to grow for an additional day after they reached late L4/young adult stage, and representative worms were photographed Scale bar = 300  $\mu$ m.

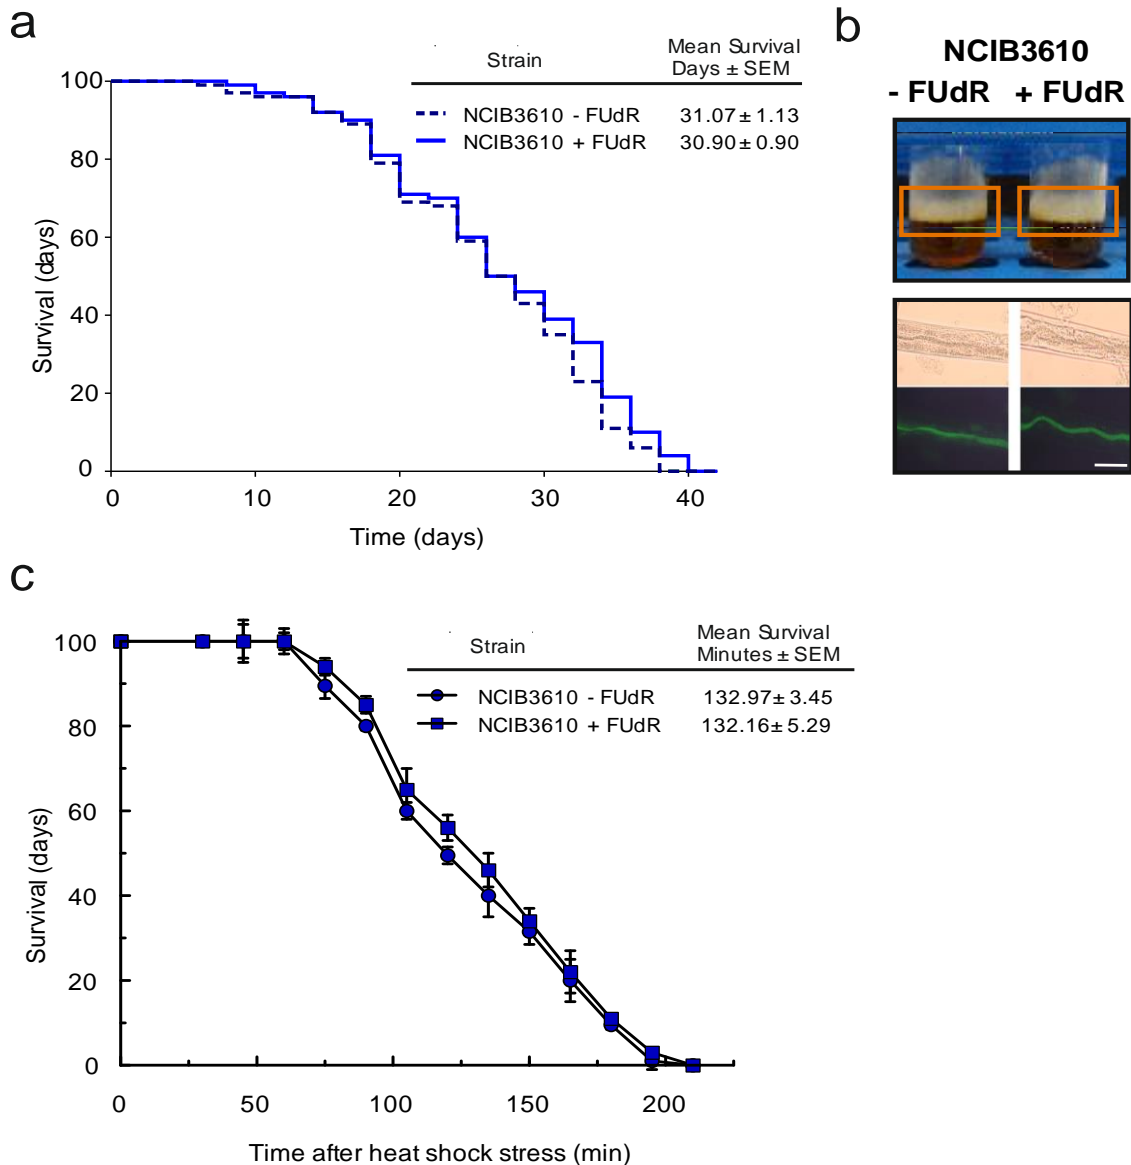

**Supplementary Figure 2. The use of FUdR does not affect neither biofilm formation nor the lifespan and heat stress resistance of *C. elegans* conferred by undomesticated *B. subtilis*.**

a) Late L4/young adult N2 worms were fed on NCIB3610 *B. subtilis* cells on NGM agar plates in the complete absence of FUdR (blue dashed line) or in the presence of 16  $\mu$ M FUdR (blue solid line) at 20  $^{\circ}$ C, and survival was monitored for signs of life as described in the “Methods” every 48 h. b) Biofilms of undomesticated *B. subtilis* strains were developed in liquid NGM in the presence or absence of 16  $\mu$ M FUdR for 24 h at 25  $^{\circ}$ C. The area delimited by the rectangles corresponds to the biofilm (or pellicle) formed at the interface between the liquid and air. Images shown on the bottom are epifluorescence micrographs of typically stained N2 *C. elegans* fed on *epsA-gfp*-expressing NCIB3610 *B. subtilis* strain in the absence or in the presence of 16  $\mu$ M FUdR. The fluorescence images were superimposed to differential interference contrast (DIC) images to depict the localization of the labels within the cells. Scale bar = 80  $\mu$ m. c) Synchronized N2 worm NGM agar plates were fed on NCIB3610 *B. subtilis* cells in the complete absence of FUdR (blue circle) or in the presence of 16  $\mu$ M FUdR (blue square) at 20  $^{\circ}$ C. As 5 days old adults, worm were shifted from 20  $^{\circ}$ C to 34  $^{\circ}$ C, and the mean survival was calculated as indicated in the “Methods”.

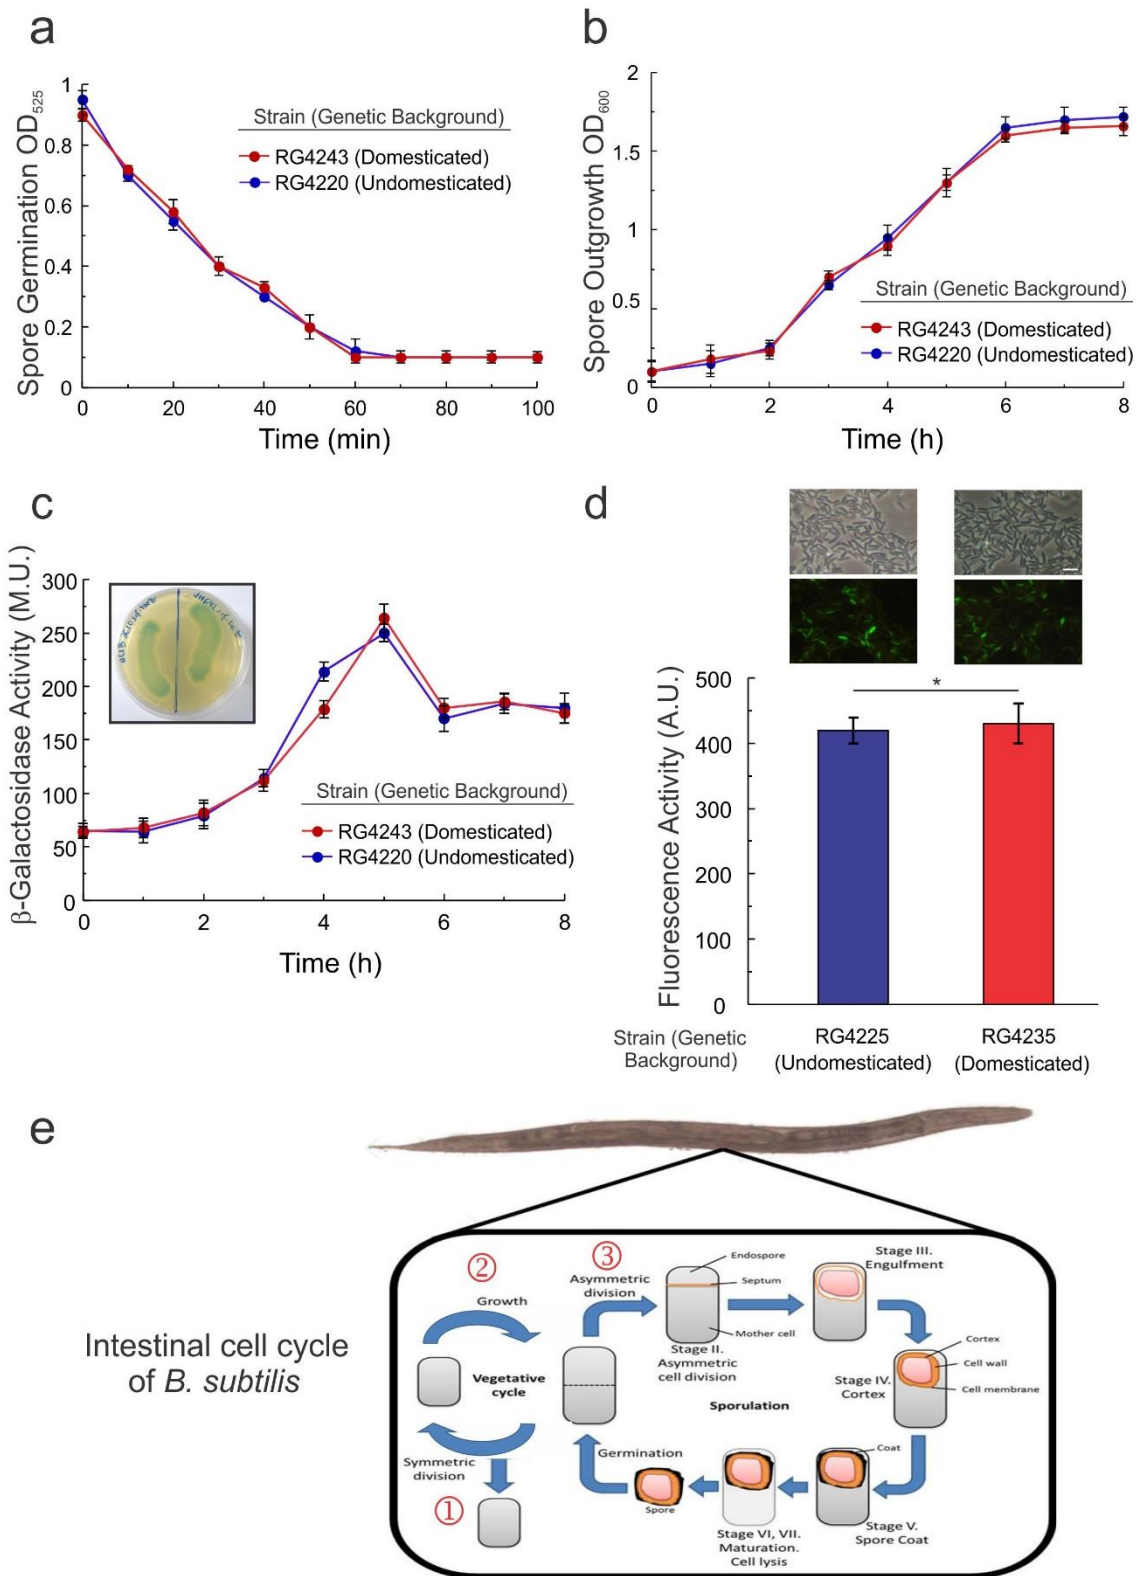

**Supplementary Figure 3.** a) Germination rate of spores of domesticated (RG4243) and undomesticated (RG4220) *B. subtilis*. Spore germination of RG4243 (red) and RG4220 (blue) *B. subtilis* was measured at 25 °C in the presence of the germination nutrients AFGK (10 mM L-alanine, 1 mM fructose, 1 mM glucose, and 10 mM potassium) as a decrease in optical density (loss of spore refractivity) at 525 nm. A representative experiment  $\pm$  SEM performed in triplicate is shown. b) Outgrowth of domesticated (RG4243) and undomesticated (RG4220) *B. subtilis*

spores is not affected in liquid NGM. Spore outgrowth of RG4220 (blue) and RG4243 (red) *B. subtilis* was monitored at 600 mm. Shown is a representative experiment  $\pm$  SEM from triplicate.

c)  $\beta$ -galactosidase expression driven by the *P<sub>srf</sub>-lacZ* construct harbored in domesticated and undomesticated *B. subtilis*. Cultures of domesticated (RG4243, red) and undomesticated (RG4223, blue) *B. subtilis* cells were developed in liquid NGM at 25 °C with shaking. Every 12 h, 20 worms were taken, washed and disrupted. Determination of  $\beta$ -galactosidase activity was performed using worm extracts. The  $\beta$ -galactosidase activity, expressed as Miller units (MU) over time (h) is shown. The insert photograph shows the growth and  $\beta$ -galactosidase expression (blue color) of strains RG4220 (right) and RG 4243 (left) after 30 h of incubation at 25 °C in NGM-Xgal agar plate. After the cells were incubated, the cells were removed, resuspended in Z-buffer at a final concentration of  $2 \times 10^7$  UFC/ml and assayed for  $\beta$ -galactosidase activity. The levels of  $\beta$ -galactosidase activity of strains RG4220 and RG4243 grew on solid NGM medium were  $1,350 \pm 115$  MU and  $1,425 \pm 130$  MU, respectively.

d) Fluorescence activity driven by domesticated and undomesticated *B. subtilis* strains harboring an ectopically integrated *epsA-gfp* fusion (Supplementary Table 1). The bacteria were planktonically grew at 25 °C on NGM agar plates supplemented with 0.5% glucose for the growth of both types of cells (RG4225 and RG4235) plus 0.01% tryptophan and 0.01% phenylalanine. After 24 h, bacteria were taken, washed resuspended and imaged by fluorescence microscopy as indicated in the Methods. Fluorescence intensity is indicated as arbitrary units (A.U.) per  $1 \times 10^5$  bacterial cells, and error bars show the mean  $\pm$  SEM from at least three independent experiments. The inserts shown are epifluorescence micrographs of domesticated- and undomesticated *epsA-gfp* cells grown on solid NGM plates. Scale bar = 3.0  $\mu$ m. \*P < 0.05 (ANOVA with Bonferroni test).

e) Worm intestinal cell cycle of *B. subtilis*. After spore germination (1), bacterial cells proliferate by vegetative cell division (symmetric division) that produces identical sister cells and growth (2). Starvation initiates sporulation where an asymmetric cell division (3) produces two cells of different size and cell destiny, the smaller forespore cell and the larger mother cell. The mother cell encloses and nurtures the forespore, deposits the protective spore coat, and eventually dies by lysis. The mature spore is released when the mother cell lyses and germinates under favorable conditions to start a new division cycle.

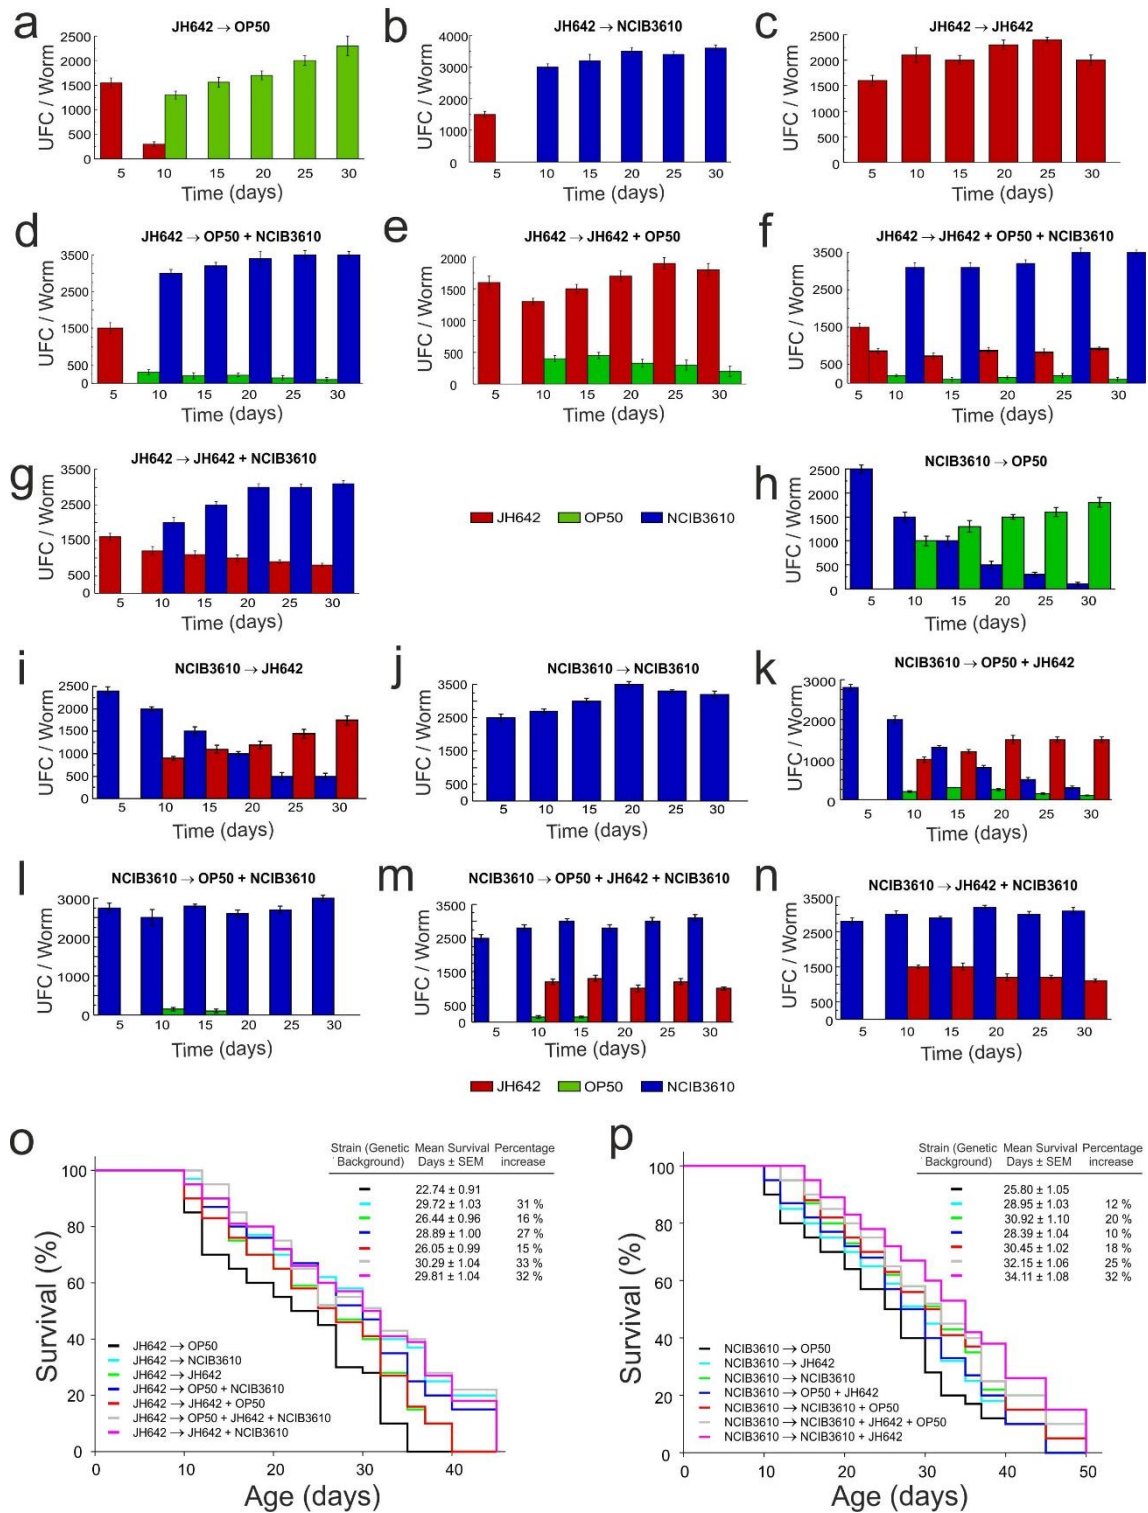

**Supplementary Figure 4. Worm gut colonization and persistence.** A large population of young *C. elegans* N2 (late L4/young adult stage) was synchronized and fed on a lawn of JH642 (graphs a-g) or NCIB3610 (graphs h-n) spores for five days. After this time (time “5” in the graphs), worms were washed and placed on 10 mm NGM agar plates containing either a lawn of spores of JH642 or NCIB3610 strains or OP50 cells or mixtures of OP50 + NCIB3610 or JH642 + OP50 or JH642 + OP50 + NCIB3610 cells as indicated in each graph and incubated at 20 °C. After the indicated incubation period, 100 worms were taken and disrupted as indicated in the Methods to quantify the number of bacterial cells of each type of strain present in the worm intestine. The differentiation between OP50, JH642 and NCIB3610 colonies (in the case of the use of bacterial

mixtures as worm food source) was established in the big differences in colony architecture between them. In addition to measuring bacterial gut colonization/persistence, worm survival (o-p) was measured as indicated in the "Methods". The presented results are representative of at least three independent experiments  $\pm$  SEM.

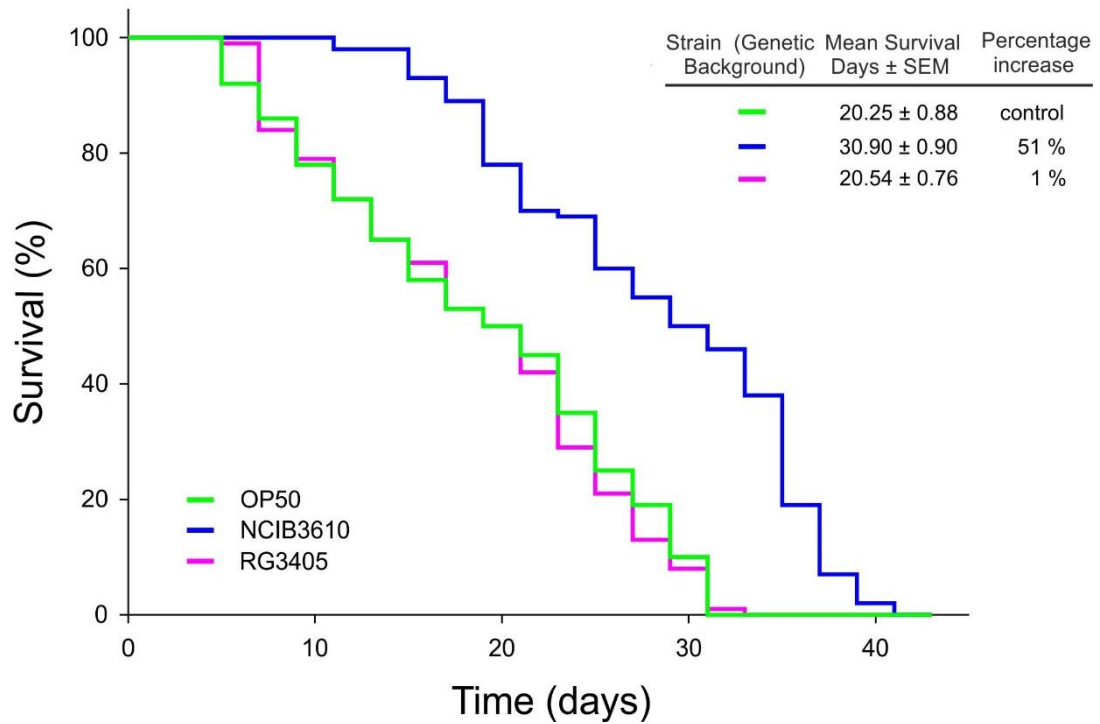

**Supplementary Figure 5. Longevity of *C. elegans* fed on *B. subtilis* cells deficient in biofilm formation and CSF production.** Late L4/young adult N2 worms were fed on spores of RG3405 *B. subtilis* cells ( $\Delta bsIA\Delta csf$ ) on NGM agar plates at 20 °C, and survival was monitored every 48 h. The mean survival was calculated as indicated in the “Methods”. Worms fed on OP50 *E. coli* (green) and NCIB3610 (blue) *B. subtilis* were used as a control. The figure shows the average of at least three independent experiments  $\pm$  SEM, and the survival increase is expressed as the total number of worms fed on OP50 *E. coli*.



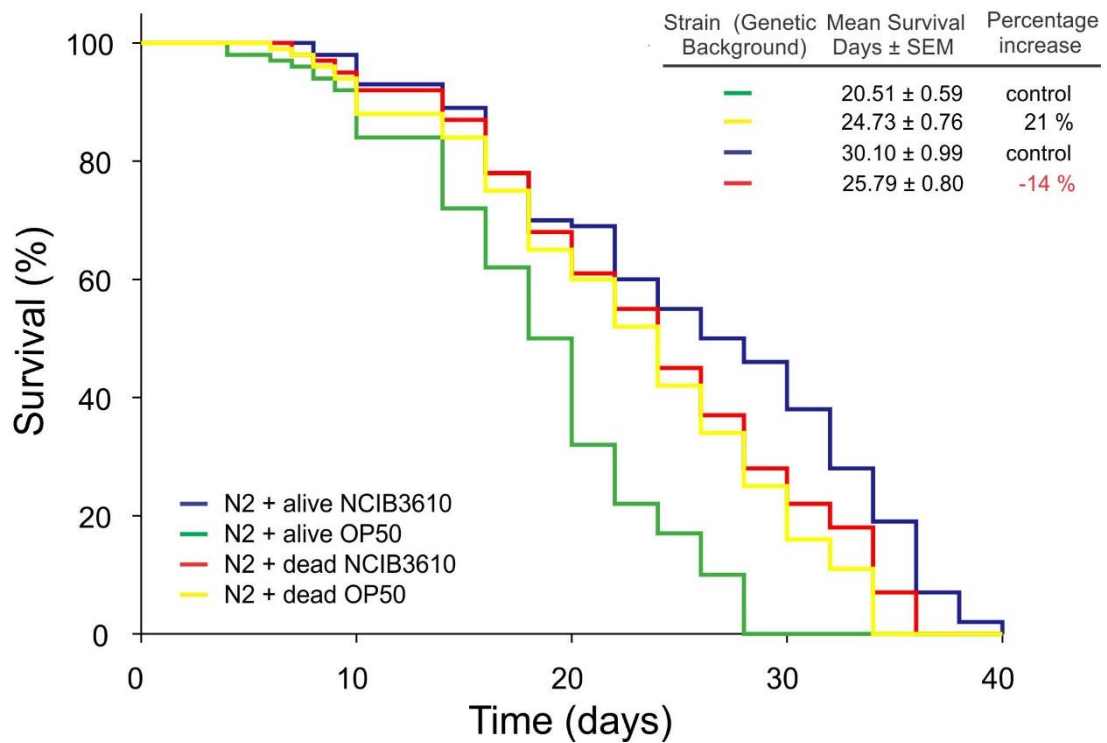

**Supplementary Figure 6. Effects of alive and dead OP50 *E. coli* and NCIB3610 *B. subtilis* in *C. elegans* lifespan.** Late L4/young adult N2 worms were fed either on alive (green) or dead (yellow) OP50 *E. coli* or alive (blue) or dead (red) NCIB3610 *B. subtilis* cells on NGM agar plates at 20 °C, and survival was monitored for signs of life as described in the “Methods” every 48 h. To obtain dead OP50 cells, the bacterial culture was heat-treated for 20 minutes at 80 °C to kill vegetative cells. To obtain dead NCIB3610 cells, the bacterial culture was heat-treated for 30 minutes at 121 °C (autoclaved) to kill spores. A representative experiment of at least three independent experiments  $\pm$  SEM is shown.

| <b>Bacterial strains</b> | <b>Relevant phenotype and/or genotype</b>                                                                                    | <b>Reference and/or source</b>                                       |
|--------------------------|------------------------------------------------------------------------------------------------------------------------------|----------------------------------------------------------------------|
| OP50                     | <i>E. coli</i> strain commonly used to feed <i>C. elegans</i>                                                                | Caenorhabditis Genetic Center, CGS                                   |
| JH642                    | <i>B. subtilis</i> domesticated strain                                                                                       | Laboratory collection (52)                                           |
| NCIB3610                 | <i>B. subtilis</i> Marburg, undomesticated strain                                                                            | Laboratory collection (49)                                           |
| RG4365                   | <i>B. subtilis</i> natto, undomesticated strain                                                                              | Laboratory collection (43)                                           |
| RG4243                   | JH642 <i>srf-lacZ::amyE-cm<sup>r</sup></i>                                                                                   | Laboratory collection (39)                                           |
| RG4220                   | NCIB3610 <i>srf-lacZ::amyE-cm<sup>r</sup></i>                                                                                | This work, RG4243→NCIB3610 (DNA from donor strain → receptor strain) |
| NRS2289                  | <i>sacA::PbslA-gfpmut2-kn<sup>r</sup></i>                                                                                    | Laboratory collection (38)                                           |
| YC164                    | pNGFP- <i>PespA-gfp-cm<sup>r</sup></i>                                                                                       | Laboratory collection (38)                                           |
| RG4225                   | NCIB3610 <i>sacA::PbslA-gfpmut2-kn<sup>r</sup></i>                                                                           | This work, NRS2289→NCIB3610                                          |
| RG4235                   | JH642 <i>sacA::PbslA-gfpmut2-kn<sup>r</sup></i>                                                                              | This work, NRS2289→JH642                                             |
| RG3601                   | NCIB3610 $\Delta$ <i>tasA::spc<sup>r</sup></i>                                                                               | Laboratory collection (26)                                           |
| RG3602                   | NCIB3610 $\Delta$ <i>epsG::pBL601-spc<sup>r</sup></i>                                                                        | Laboratory collection (26)                                           |
| RG3603                   | NCIB3610 $\Delta$ <i>bslA::phe<sup>r</sup></i>                                                                               | Laboratory collection (26)                                           |
| RG3000                   | 168 $\Delta$ <i>nos::ery<sup>r</sup></i>                                                                                     | Bacillus Genetic Stock Center (BGSC)                                 |
| RG3610                   | NCIB3610 $\Delta$ <i>nos::ery<sup>r</sup></i>                                                                                | This work, RG3000→NCIB3610                                           |
| RG3620                   | NCIB3610 pNGFP- <i>PespA-gfp-cm<sup>r</sup></i>                                                                              | YC164→NCIB3610                                                       |
| RG3621                   | NCIB3610 $\Delta$ <i>nos::ery<sup>r</sup></i> pNGFP- <i>PespA-gfp-cm<sup>r</sup></i>                                         | YC164→RG3610                                                         |
| RG3622                   | NCIB3610 $\Delta$ <i>bslA::tc<sup>r</sup></i> pNGFP- <i>PespA-gfp-cm<sup>r</sup></i>                                         | YC164→RG3603                                                         |
| RG3611                   | NCIB3610 $\Delta$ <i>nos::ery<sup>r</sup></i> / $\Delta$ <i>bslA::phe<sup>r</sup></i>                                        | This work, RG3603→RG3610                                             |
| RG3623                   | NCIB3610 $\Delta$ <i>nos::ery<sup>r</sup></i> / $\Delta$ <i>bslA::phe<sup>r</sup></i> pNGFP- <i>PespA-gfp-cm<sup>r</sup></i> | This work, YC164→RG3611                                              |
| RG657                    | JH642 $\Delta$ <i>csf::tc<sup>r</sup></i>                                                                                    | Laboratory collection (102)                                          |
| RG4010                   | NCIB3610 $\Delta$ <i>csf::tc<sup>r</sup></i>                                                                                 | This work, RG657→NCIB3610                                            |
| RG3405                   | NCIB3610 $\Delta$ <i>bslA::phe<sup>r</sup></i> / $\Delta$ <i>csf::tc<sup>r</sup></i>                                         | This work, RG4010→RG3603                                             |
| LC3601                   | NCIB3610 $\Delta$ <i>nos::ery<sup>r</sup></i> / $\Delta$ <i>csf::tc<sup>r</sup></i>                                          | This work, RG657→RG3610                                              |

|                                  |                                                                      |                                    |
|----------------------------------|----------------------------------------------------------------------|------------------------------------|
| LC3611                           | NCIB3610 $\Delta nos::tc^r / \Delta bslA::phe^r / \Delta csf::spc^r$ | This work, RG4010 → RG3611         |
| <b><i>C. elegans</i> strains</b> | <b>Relevant genotype</b>                                             | <b>Reference and/or source</b>     |
| N2                               | Reference wt strain, isolated in Bristol, U.K.                       | Caenorhabditis Genetic Center, CGS |
| CB1370                           | <i>daf-2 (e1370)III</i>                                              | Caenorhabditis Genetic Center, CGS |
| CF1038                           | <i>daf-16 (mu86) I</i>                                               | Caenorhabditis Genetic Center, CGS |
| PS3551                           | <i>hsf-1 (sy441) I</i>                                               | Caenorhabditis Genetic Center, CGS |

**Supplementary Table 1.** Bacterial and *C. elegans* strains used in this work.

| <i>C. elegans</i> strain | Related to figure | Type of stress            | Bacterial strain (genetic background) | Repeats | Number of animals that died/total | Mean survival ( <sup>a</sup> days or <sup>b</sup> minutes) | Average of mean survivals $\pm$ S.E.M. ( <sup>a</sup> days or <sup>b</sup> minutes) | Interval of average survival with 95 % ( <sup>a</sup> days or <sup>b</sup> minutes) | Average survival increase (%) / P value |
|--------------------------|-------------------|---------------------------|---------------------------------------|---------|-----------------------------------|------------------------------------------------------------|-------------------------------------------------------------------------------------|-------------------------------------------------------------------------------------|-----------------------------------------|
| N2                       | 1a                | None                      | OP50 (wt)                             | 1       | 80/90                             | 18.33 <sup>a</sup>                                         | 20.25 $\pm$ 0.88 <sup>a</sup>                                                       | 18.52 - 21.97 <sup>a</sup>                                                          | control                                 |
|                          |                   |                           |                                       | 2       | 98/100                            | 21.53 <sup>a</sup>                                         |                                                                                     |                                                                                     |                                         |
|                          |                   |                           |                                       | 3       | 99/99                             | 20.89 <sup>a</sup>                                         |                                                                                     |                                                                                     |                                         |
|                          |                   |                           | JH642 (wt)                            | 1       | 89/98                             | 24.95 <sup>a</sup>                                         | 25.02 $\pm$ 0.83 <sup>a</sup>                                                       | 23.39 - 26.65 <sup>a</sup>                                                          | 23.56 / 0.0004                          |
|                          |                   |                           |                                       | 2       | 93/100                            | 26.05 <sup>a</sup>                                         |                                                                                     |                                                                                     |                                         |
|                          |                   |                           |                                       | 3       | 97/100                            | 24.06 <sup>a</sup>                                         |                                                                                     |                                                                                     |                                         |
|                          |                   |                           | NCIB3610 (wt)                         | 1       | 89/100                            | 31.27 <sup>a</sup>                                         | 30.90 $\pm$ 0.90 <sup>a</sup>                                                       | 29.14 - 32.67 <sup>a</sup>                                                          | 52.59 / 0                               |
|                          |                   |                           |                                       | 2       | 87/100                            | 30.95 <sup>a</sup>                                         |                                                                                     |                                                                                     |                                         |
|                          |                   |                           |                                       | 3       | 94/100                            | 30.48 <sup>a</sup>                                         |                                                                                     |                                                                                     |                                         |
|                          | 1b                | Temperature (34 °C)       | OP50                                  | 1       | 50/50                             | 34.50 <sup>b</sup>                                         | 34.91 $\pm$ 1.04 <sup>b</sup>                                                       | 32.88 - 36.94 <sup>b</sup>                                                          | control                                 |
|                          |                   |                           |                                       | 2       | 60/60                             | 35.25 <sup>b</sup>                                         |                                                                                     |                                                                                     |                                         |
|                          |                   |                           |                                       | 3       | 61/61                             | 34.97 <sup>b</sup>                                         |                                                                                     |                                                                                     |                                         |
|                          |                   |                           | JH642                                 | 1       | 55/55                             | 97.64 <sup>b</sup>                                         | 97.58 $\pm$ 2.03 <sup>b</sup>                                                       | 93.59 - 101.57 <sup>b</sup>                                                         | 179.52 / 0                              |
|                          |                   |                           |                                       | 2       | 60/60                             | 97.5 <sup>b</sup>                                          |                                                                                     |                                                                                     |                                         |
|                          |                   |                           |                                       | 3       | 57/57                             | 97.6 <sup>b</sup>                                          |                                                                                     |                                                                                     |                                         |
|                          |                   |                           | NCIB3610                              | 1       | 55/55                             | 131.18 <sup>b</sup>                                        | 132.16 $\pm$ 5.29 <sup>b</sup>                                                      | 121.81 - 142.51 <sup>b</sup>                                                        | 278.57 / 0                              |
|                          |                   |                           |                                       | 2       | 50/50                             | 133.20 <sup>b</sup>                                        |                                                                                     |                                                                                     |                                         |
|                          |                   |                           |                                       | 3       | 52/53                             | 132.10 <sup>b</sup>                                        |                                                                                     |                                                                                     |                                         |
|                          | 1c                | Osmotic (NaCl 200 mmol/L) | OP50                                  | 1       | 74/74                             | 120.43 <sup>b</sup>                                        | 114.43 $\pm$ 6.11 <sup>b</sup>                                                      | 102.46 - 126.41 <sup>b</sup>                                                        | control                                 |
|                          |                   |                           |                                       | 2       | 75/76                             | 116.90 <sup>b</sup>                                        |                                                                                     |                                                                                     |                                         |
|                          |                   |                           |                                       | 3       | 70/70                             | 105.96 <sup>b</sup>                                        |                                                                                     |                                                                                     |                                         |
| JH642                    |                   |                           | 1                                     | 91/91   | 201.85 <sup>b</sup>               | 206.79 $\pm$ 8.35 <sup>b</sup>                             | 190.42 - 223.16 <sup>b</sup>                                                        | 80.71 / 0                                                                           |                                         |
|                          |                   |                           | 2                                     | 85/85   | 209.56 <sup>b</sup>               |                                                            |                                                                                     |                                                                                     |                                         |
|                          |                   |                           | 3                                     | 92/94   | 208.96 <sup>b</sup>               |                                                            |                                                                                     |                                                                                     |                                         |
| NCIB3610                 |                   |                           | 1                                     | 92/92   | 253.80 <sup>b</sup>               | 257.96 $\pm$ 4.49 <sup>b</sup>                             | 249.16 - 266.75 <sup>b</sup>                                                        | 125.43 / 0                                                                          |                                         |
|                          |                   |                           | 2                                     | 94/96   | 251.64 <sup>b</sup>               |                                                            |                                                                                     |                                                                                     |                                         |

|    |                                                           |          |   |         |                     |                            |                              |                       |
|----|-----------------------------------------------------------|----------|---|---------|---------------------|----------------------------|------------------------------|-----------------------|
|    |                                                           |          | 3 | 90/90   | 268.44 <sup>b</sup> |                            |                              |                       |
| 1d | Metal ( Cd <sup>2+</sup><br>50 µmol/L)                    | OP50     | 1 | 71/71   | 45.13 <sup>b</sup>  | 46.66 ± 3.08 <sup>b</sup>  | 40.62 - 52.70 <sup>b</sup>   | control               |
|    |                                                           |          | 2 | 65/65   | 47.76 <sup>b</sup>  |                            |                              |                       |
|    |                                                           |          | 3 | 69/69   | 47.09 <sup>b</sup>  |                            |                              |                       |
|    |                                                           | JH642    | 1 | 108/108 | 79.78 <sup>b</sup>  | 80.18 ± 4.60 <sup>b</sup>  | 71.15 - 89.20 <sup>b</sup>   | 71.75 /<br>0.00000001 |
|    |                                                           |          | 2 | 110/110 | 73.88 <sup>b</sup>  |                            |                              |                       |
|    |                                                           |          | 3 | 107/107 | 86.88 <sup>b</sup>  |                            |                              |                       |
|    |                                                           | NCIB3610 | 1 | 80/81   | 107.43 <sup>b</sup> | 110.38 ± 5.18 <sup>b</sup> | 100.23 - 120.53 <sup>b</sup> | 136.56 / 0            |
|    |                                                           |          | 2 | 78/78   | 109.08 <sup>b</sup> |                            |                              |                       |
|    |                                                           |          | 3 | 75/75   | 114.63 <sup>b</sup> |                            |                              |                       |
| 1e | Oxidative<br>(H <sub>2</sub> O <sub>2</sub> 25<br>mmol/L) | OP50     | 1 | 61/61   | 78.56 <sup>b</sup>  | 81.00 ± 3.69 <sup>b</sup>  | 73.77 - 88.23 <sup>b</sup>   | control               |
|    |                                                           |          | 2 | 62/62   | 83.46 <sup>b</sup>  |                            |                              |                       |
|    |                                                           |          | 3 | 60/60   | 80.98 <sup>b</sup>  |                            |                              |                       |
|    |                                                           | JH642    | 1 | 71/71   | 109.12 <sup>b</sup> | 109.50 ± 4.36 <sup>b</sup> | 100.96 - 118.04 <sup>b</sup> | 35.19<br>/0.0000008   |
|    |                                                           |          | 2 | 70/70   | 104.85 <sup>b</sup> |                            |                              |                       |
|    |                                                           |          | 3 | 71/71   | 114.53 <sup>b</sup> |                            |                              |                       |
|    |                                                           | NCIB3610 | 1 | 74/74   | 133.26 <sup>b</sup> | 139.80 ± 5.25 <sup>b</sup> | 129.51 - 150.09 <sup>b</sup> | 72.59 / 0             |
|    |                                                           |          | 2 | 80/81   | 142.69 <sup>b</sup> |                            |                              |                       |
|    |                                                           |          | 3 | 78/78   | 143.45 <sup>b</sup> |                            |                              |                       |

**Supplementary Table 2: Lifespan analysis related to Figure 1.**

Undomesticated *B. subtilis* cells extend *C. elegans* survival under normal and stressful (thermal, osmotic, metal and oxidative) conditions. Each data set consists of three independent repeats fitted to Boltzmann sigmoid curve and the mean survival time ± SEM and the confidence interval (CI) are indicated. Percentage (%) survival change was determined against control OP50 *E. coli* cells under the same experimental condition (type of stress). Independent experimental and control analysis were done side by side and indicated by same number (1, 2, or 3) in the repeat column. *P*-values for each treatment were calculated against the correspondent control by Log-rank test. Survival data were calculated using Kaplan-Meier test.

| <i>C. elegans</i> strain | Related to figure | Type of stress | Bacterial strain | FUdR | Repeats | Number of dead animals/total | Mean survival (days <sup>a</sup> /minutes <sup>b</sup> ) | Average of mean survivals ± S.E.M. (days <sup>a</sup> /minutes <sup>b</sup> ) | Interval of average survival with 95% (days <sup>a</sup> /minutes <sup>b</sup> ) | Average survival increase (%) |
|--------------------------|-------------------|----------------|------------------|------|---------|------------------------------|----------------------------------------------------------|-------------------------------------------------------------------------------|----------------------------------------------------------------------------------|-------------------------------|
| N2                       | S2a               | None           | NCIB3610         | -    | 1       | 99/100                       | 30.88 <sup>a</sup>                                       | 31.07 ± 1.13 <sup>a</sup>                                                     | 29.45 - 32.78 <sup>a</sup>                                                       | 53.43                         |
|                          |                   |                |                  | -    | 2       | 98/100                       | 31.36 <sup>a</sup>                                       |                                                                               |                                                                                  |                               |
|                          |                   |                |                  | -    | 3       | 93/100                       | 31.29 <sup>a</sup>                                       |                                                                               |                                                                                  |                               |
| N2                       |                   |                | NCIB3610         | +    | 1       | 89/100                       | 31.27 <sup>a</sup>                                       | 30.90 ± 0.90 <sup>a</sup>                                                     | 29.14 - 32.67 <sup>a</sup>                                                       | 52.59                         |
|                          |                   |                |                  | +    | 2       | 87/100                       | 30.95 <sup>a</sup>                                       |                                                                               |                                                                                  |                               |
|                          |                   |                |                  | +    | 3       | 94/100                       | 30.48 <sup>a</sup>                                       |                                                                               |                                                                                  |                               |
| N2                       | S2c               | Temperature    | NCIB3610         | -    | 1       | 62/62                        | 132.88 <sup>b</sup>                                      | 132.97 ± 3.45 <sup>b</sup>                                                    | 124.52 - 143.48 <sup>b</sup>                                                     | 280.89                        |
|                          |                   |                |                  | -    | 2       | 51/53                        | 132.35 <sup>b</sup>                                      |                                                                               |                                                                                  |                               |
|                          |                   |                |                  | -    | 3       | 50/50                        | 133.69 <sup>b</sup>                                      |                                                                               |                                                                                  |                               |
| N2                       |                   |                | NCIB3610         | +    | 1       | 55/55                        | 131.18 <sup>b</sup>                                      | 132.16 ± 5.29 <sup>b</sup>                                                    | 121.81 - 142.51 <sup>b</sup>                                                     | 278.57                        |
|                          |                   |                |                  | +    | 2       | 50/50                        | 133.20 <sup>b</sup>                                      |                                                                               |                                                                                  |                               |
|                          |                   |                |                  | +    | 3       | 52/53                        | 132.10 <sup>b</sup>                                      |                                                                               |                                                                                  |                               |

**Supplementary Table 3. Undomesticated *B. subtilis* cells extend *C. elegans* survival and confer resistance to heat shock either in the presence or in the absence of FUdR.** Each data set consists of three independent repeats fitted to Boltzmann sigmoid curve and the mean survival time ± SEM and the confidence interval (CI) are indicated. Percentage (%) survival change was determined against control OP50 *E. coli* cells under the same experimental condition (type of stress). Independent experimental and control analysis were done side by side and indicated by same number (1, 2, or 3) in the repeat column. Survival for each treatment was calculated against the correspondent control using Kaplan-Meier test.

| <i>C. elegans</i> strain | Related to supplementary figure | First bacterial strain | Second bacterial strain (genetic background) | Repeats | Number of animals that died/total | Mean survival days | Average of mean survival days $\pm$ S.E.M | Interval of average survival days with 95 % | Average survival increase (%) |         |
|--------------------------|---------------------------------|------------------------|----------------------------------------------|---------|-----------------------------------|--------------------|-------------------------------------------|---------------------------------------------|-------------------------------|---------|
| N2                       | 4o                              | JH642                  | OP50 (wt)                                    | 1       | 100/100                           | 26.79              | 22.74 $\pm$ 0.91                          | 20.96 - 24.52                               | control                       |         |
|                          |                                 |                        |                                              | 2       | 92/100                            | 19.43              |                                           |                                             |                               |         |
|                          |                                 |                        |                                              | 3       | 100/100                           | 22.00              |                                           |                                             |                               |         |
|                          |                                 |                        | JH642 (wt)                                   | 1       | 100/100                           | 25.28              | 26.44 $\pm$ 0.96                          | 24.56 - 28.32                               | 16.27                         |         |
|                          |                                 |                        |                                              | 2       | 99/100                            | 26.88              |                                           |                                             |                               |         |
|                          |                                 |                        |                                              | 3       | 100/100                           | 27.16              |                                           |                                             |                               |         |
|                          |                                 |                        | NCIB3610 (wt)                                | 1       | 100/100                           | 30.16              | 29.72 $\pm$ 1.03                          | 27.70 - 31.74                               | 30.69                         |         |
|                          |                                 |                        |                                              | 2       | 98/100                            | 29.54              |                                           |                                             |                               |         |
|                          |                                 |                        |                                              | 3       | 100/100                           | 29.46              |                                           |                                             |                               |         |
|                          |                                 |                        | OP50 + NCIB3610                              | 1       | 100/100                           | 30.26              | 28.89 $\pm$ 1.00                          | 26.93 - 30.86                               | 27.05                         |         |
|                          |                                 |                        |                                              | 2       | 100/100                           | 29.07              |                                           |                                             |                               |         |
|                          |                                 |                        |                                              | 3       | 100/100                           | 27.34              |                                           |                                             |                               |         |
|                          |                                 |                        | OP50 + JH642                                 | 1       | 96/100                            | 26.42              | 26.05 $\pm$ 0.99                          | 24.12 - 27.98                               | 14.56                         |         |
|                          |                                 |                        |                                              | 2       | 100/100                           | 26.00              |                                           |                                             |                               |         |
|                          |                                 |                        |                                              | 3       | 100/100                           | 25.73              |                                           |                                             |                               |         |
|                          |                                 |                        | OP50 + JH642 + NCIB3610                      | 1       | 100/100                           | 29.40              | 30.29 $\pm$ 1.04                          | 28.25 - 32.34                               | 33.20                         |         |
|                          |                                 |                        |                                              | 2       | 100/100                           | 31.86              |                                           |                                             |                               |         |
|                          |                                 |                        |                                              | 3       | 100/100                           | 29.61              |                                           |                                             |                               |         |
|                          | JH642 + NCIB3610                | 1                      | 95/100                                       | 27.60   | 29.81 $\pm$ 1.04                  | 27.77 - 31.85      | 31.91                                     |                                             |                               |         |
|                          |                                 | 2                      | 100/100                                      | 31.09   |                                   |                    |                                           |                                             |                               |         |
|                          |                                 | 3                      | 100/100                                      | 31.28   |                                   |                    |                                           |                                             |                               |         |
|                          |                                 |                        |                                              | OP50    | 1                                 | 100/100            | 26.43                                     | 25.80 $\pm$ 1.05                            | 23.74 - 27.86                 | control |
|                          |                                 |                        |                                              |         | 2                                 | 100/100            | 24.64                                     |                                             |                               |         |
|                          |                                 |                        |                                              |         | 3                                 | 98/100             | 26.33                                     |                                             |                               |         |
|                          |                                 |                        |                                              | JH642   | 1                                 | 100/100            | 30.00                                     | 28.95 $\pm$ 1.03                            | 26.94 - 30.97                 | 12.21   |
|                          |                                 |                        |                                              |         | 2                                 | 100/100            | 28.53                                     |                                             |                               |         |
|                          |                                 |                        |                                              |         | 3                                 | 100/100            | 28.32                                     |                                             |                               |         |
| NCIB3610                 |                                 |                        |                                              | 1       | 100/100                           | 30.62              | 30.92 $\pm$ 1.1                           | 28.76 - 33.08                               | 19.84                         |         |
|                          |                                 |                        |                                              | 2       | 97/100                            | 33.29              |                                           |                                             |                               |         |
|                          |                                 |                        |                                              | 3       | 100/100                           | 28.85              |                                           |                                             |                               |         |
| OP50 +                   |                                 |                        |                                              | 1       | 100/100                           | 29.64              |                                           |                                             |                               |         |

|    |                  |                         |         |         |              |              |               |       |
|----|------------------|-------------------------|---------|---------|--------------|--------------|---------------|-------|
| 4p | NCIB3610         | OP50 + JH642            | 2       | 100/100 | 26.83        | 28.39 ± 1.04 | 26.35 - 30.43 | 10.04 |
|    |                  |                         | 3       | 95/100  | 28.70        |              |               |       |
|    |                  | OP50 + NCIB3610         | 1       | 100/100 | 31.26        | 30.45 ± 1.02 | 28.45 - 32.46 | 18.02 |
|    |                  |                         | 2       | 100/100 | 29.21        |              |               |       |
|    |                  |                         | 3       | 100/100 | 30.88        |              |               |       |
|    |                  | OP50 + JH642 + NCIB3610 | 1       | 98/100  | 33.56        | 32.15 ± 1.06 | 30.08 - 34.22 | 24.61 |
|    | 2                |                         | 100/100 | 35.26   |              |              |               |       |
|    | 3                |                         | 100/100 | 27.63   |              |              |               |       |
|    | JH642 + NCIB3610 | 1                       | 100/100 | 35.12   | 34.11 ± 1.08 | 32 - 36.22   | 32.21         |       |
|    |                  | 2                       | 100/100 | 33.26   |              |              |               |       |
|    |                  | 3                       | 100/100 | 33.95   |              |              |               |       |

**Supplementary Table 4. Lifespan analysis related to Supplementary Figure 4.**

Undomesticated *B. subtilis* cells are better suited to colonize and persist in the gut of *C. elegans*. Each data set consists of three independent repeats fitted to Boltzmann sigmoid curve and the mean survival time ± SEM and CI are indicated. Percentage (%) survival change was determined against control worms fed on JH642 or NCIB3610 *B. subtilis* cells and shifted to the presence of OP50 *E. coli* cells. Independent experimental and control analysis were done side by side and indicated by same number (1, 2, or 3) in the repeat column. Survival data were calculated by Kaplan-Meier test.



| <i>C. elegans</i> strain       | Related to figure       | Bacterial strain (genetic background) | Repeats | Number of animals that died/total | Mean survival days | Average of mean survival days $\pm$ S.E.M. | Interval of average survival days with 95 % | Average survival increase (%) |
|--------------------------------|-------------------------|---------------------------------------|---------|-----------------------------------|--------------------|--------------------------------------------|---------------------------------------------|-------------------------------|
| N2                             | 3b                      | OP50 (wt)                             | 1       | 80/90                             | 18.33              | 19.53 $\pm$ 0.93                           | 17.70 - 21.36                               | control                       |
|                                |                         |                                       | 2       | 79/95                             | 21.36              |                                            |                                             |                               |
|                                |                         |                                       | 3       | 88/93                             | 18.90              |                                            |                                             |                               |
|                                |                         | NCIB3610 (wt)                         | 1       | 96/105                            | 30.68              | 31.00 $\pm$ 0.89                           | 29.25 - 32.75                               | 58.73                         |
|                                |                         |                                       | 2       | 99/106                            | 31.52              |                                            |                                             |                               |
|                                |                         |                                       | 3       | 94/101                            | 30.80              |                                            |                                             |                               |
|                                |                         | RG3601 ( $\Delta$ tasA)               | 1       | 91/100                            | 20.35              | 21.84 $\pm$ 0.95                           | 19.98 - 23.71                               | 11.82                         |
|                                |                         |                                       | 2       | 93/99                             | 22.01              |                                            |                                             |                               |
|                                |                         |                                       | 3       | 99/101                            | 23.16              |                                            |                                             |                               |
|                                | RG3602 ( $\Delta$ epsG) | 1                                     | 89/100  | 22.86                             | 22.90 $\pm$ 0.83   | 21.28 - 24.52                              | 17.26                                       |                               |
|                                |                         | 2                                     | 95/100  | 22.78                             |                    |                                            |                                             |                               |
|                                |                         | 3                                     | 98/101  | 23.06                             |                    |                                            |                                             |                               |
|                                | RG3603 ( $\Delta$ bslA) | 1                                     | 89/100  | 23.76                             | 23.26 $\pm$ 1.07   | 21.16 - 25.36                              | 19.10                                       |                               |
|                                |                         | 2                                     | 97/101  | 22.79                             |                    |                                            |                                             |                               |
|                                |                         | 3                                     | 98/100  | 23.23                             |                    |                                            |                                             |                               |
|                                | 3d                      | OP50                                  | 1       | 82/95                             | 18.35              | 19.45 $\pm$ 0.63                           | 17.62 - 21.28                               | control                       |
|                                |                         |                                       | 2       | 90/95                             | 21.05              |                                            |                                             |                               |
|                                |                         |                                       | 3       | 92/98                             | 18.95              |                                            |                                             |                               |
| NCIB3610                       |                         | 1                                     | 103/105 | 32.06                             | 31.28 $\pm$ 0.88   | 29.08 - 33.42                              | 60.82                                       |                               |
|                                |                         | 2                                     | 92/102  | 30.68                             |                    |                                            |                                             |                               |
|                                |                         | 3                                     | 98/104  | 31.10                             |                    |                                            |                                             |                               |
| RG3601 +<br>RG3602 +<br>RG3603 |                         | 1                                     | 88/95   | 30.05                             | 29.59 $\pm$ 1.05   | 27.52 - 31.65                              | 52.13                                       |                               |
|                                |                         | 2                                     | 98/99   | 29.48                             |                    |                                            |                                             |                               |
|                                |                         | 3                                     | 99/100  | 29.24                             |                    |                                            |                                             |                               |

**Supplementary Table 5. Lifespan analysis related to Figure 3.**

*Bacillus subtilis* biofilm formation proficiency is required to extend the longevity of *C. elegans*. Each data set consists of three independent repeats fitted to Boltzmann sigmoid curve and the mean survival time  $\pm$  SEM and CI are indicated. Percentage (%) survival change of worms fed on wild-type or biofilm-deficient *B. subtilis* cells was determined against control worms fed on OP50 *E. coli* cells. Independent experimental and control analysis were done side by side and indicated by same number (1, 2, or 3) in the repeat column. Survival data were calculated by Kaplan-Meier test.

| MEDIA | BACTERIAL STRAIN | GROWTH CONDITION | NO production<br>(nitrate and nitrite<br>mmol /1.0 X 10 <sup>8</sup> cells) |
|-------|------------------|------------------|-----------------------------------------------------------------------------|
| NGM   | OP50             | Aerobic          | 5.2 ± 0.7                                                                   |
| NGM   | OP50             | Microaerophilic  | 132.5 ± 0.9                                                                 |
| NGM   | OP50             | Anaerobic        | 24.9 ± 0.8                                                                  |

**Supplementary Table 6.** NO production proficiency of OP50 *E. coli* cells grown under different oxygen tensions. The OP50 strain was grown with shaking (180 rpm, aerobic condition), without shaking (microaerophilic condition) or in anaerobic jar (Oxoid-anaerogen 2.5L, anaerobic condition) in NGM broth at 25 °C for 36 h. Then, the supernatants of each culture were taken and filter sterilized. Appropriate aliquots of each cell-free supernatant were assayed for the presence of NO-derived metabolites (NO<sub>2</sub><sup>-</sup> and NO<sub>3</sub><sup>-</sup>). Data are representative of at least three experiments made by triplicate.

| <i>C. elegans</i> strain | Related to figure | Bacterial strain (genetic background) | Repeats | Number of animals that died/total | Mean survival days | Average of mean survival days + S.E.M. | Interval of average survival days with 95 % | Average survival increase (%) |
|--------------------------|-------------------|---------------------------------------|---------|-----------------------------------|--------------------|----------------------------------------|---------------------------------------------|-------------------------------|
| N2                       | 4a                | OP50 (wt)                             | 1       | 101/106                           | 20.16              | 19.78 ± 0.94                           | 17.93 - 21.63                               | control                       |
|                          |                   |                                       | 2       | 104/405                           | 18.88              |                                        |                                             |                               |
|                          |                   |                                       | 3       | 100/100                           | 20.30              |                                        |                                             |                               |
|                          |                   | NCIB3610 (wt)                         | 1       | 92/92                             | 29.86              | 30.29 ± 0.88                           | 28.26 - 32.33                               | 53.13                         |
|                          |                   |                                       | 2       | 89/95                             | 31.29              |                                        |                                             |                               |
|                          |                   |                                       | 3       | 93/94                             | 29.72              |                                        |                                             |                               |
|                          |                   | RG3610 ( $\Delta nos$ )               | 1       | 78/102                            | 24.82              | 25.55 ± 1.14                           | 23.31 - 27.79                               | 29.17                         |
|                          |                   |                                       | 2       | 98/100                            | 26.98              |                                        |                                             |                               |
|                          |                   |                                       | 3       | 89/104                            | 24.82              |                                        |                                             |                               |
|                          |                   | RG3603 ( $\Delta bsIA$ )              | 1       | 102/102                           | 22.08              | 22.03 ± 0.97                           | 20.13 - 23.94                               | 11.38                         |
|                          |                   |                                       | 2       | 100/103                           | 21.38              |                                        |                                             |                               |
|                          |                   |                                       | 3       | 98/99                             | 22.63              |                                        |                                             |                               |
|                          |                   | RG3611 ( $\Delta nos \Delta bsIA$ )   | 1       | 92/100                            | 20.48              | 20.06 ± 0.79                           | 18.52 - 21.60                               | 1.42                          |
|                          |                   |                                       | 2       | 91/100                            | 20.24              |                                        |                                             |                               |
|                          |                   |                                       | 3       | 96/100                            | 19.46              |                                        |                                             |                               |
|                          |                   | RG3610 + RG3603                       | 1       | 92/98                             | 29.73              | 29.51 ± 1.14                           | 27.27 - 31.75                               | 49.19                         |
|                          |                   |                                       | 2       | 89/96                             | 29.47              |                                        |                                             |                               |
|                          |                   |                                       | 3       | 92/100                            | 29.33              |                                        |                                             |                               |

**Supplementary Table 7. Lifespan analysis related to Figure 4.**

Biofilm formation proficiency and NO production contribute to extend *C. elegans* longevity. Each data set consists of three independent repeats fitted to Boltzmann sigmoid curve and the mean survival time ± SEM and CI are indicated. Percentage (%) survival change of worms fed on wild-type or mutant ( $\Delta nos$ ,  $\Delta bsIA$ ,  $\Delta nos \Delta bsIA$ , or  $\Delta nos + \Delta nos \Delta bsIA$ ) *B. subtilis* cells was determined against control worms fed on OP50 *E. coli* cells. Independent experimental and control analysis were done side by side and indicated by same number (1, 2, or 3) in the repeat column. Survival data were calculated by Kaplan-Meier test.

| <i>C. elegans</i> strain | Relative to figure                                            | Bacterial strain (genetic background)             | Repeats | Number of animals that died/total | Mean survival days | Average of mean survival days $\pm$ S.E.M. | Interval of average survival days with 95 % | Average survival increase (%) |
|--------------------------|---------------------------------------------------------------|---------------------------------------------------|---------|-----------------------------------|--------------------|--------------------------------------------|---------------------------------------------|-------------------------------|
| N2                       | 5a                                                            | OP50 (wt)                                         | 1       | 100/100                           | 19.65              | 20.14 $\pm$ 0.82                           | 18.53 - 21.75                               | control                       |
|                          |                                                               |                                                   | 2       | 87/100                            | 22.06              |                                            |                                             |                               |
|                          |                                                               |                                                   | 3       | 100/100                           | 18.71              |                                            |                                             |                               |
|                          |                                                               | NCIB3610 (wt)                                     | 1       | 100/102                           | 31.06              | 30.74 $\pm$ 0.94                           | 28.9 - 32.58                                | 52.63                         |
|                          |                                                               |                                                   | 2       | 96/100                            | 30.16              |                                            |                                             |                               |
|                          |                                                               |                                                   | 3       | 91/100                            | 31.00              |                                            |                                             |                               |
|                          |                                                               | RG4010 ( $\Delta$ csf)                            | 1       | 100/103                           | 25.86              | 26.16 $\pm$ 0.89                           | 24.41 - 27.91                               | 29.89                         |
|                          |                                                               |                                                   | 2       | 100/100                           | 27.59              |                                            |                                             |                               |
|                          |                                                               |                                                   | 3       | 100/105                           | 25.03              |                                            |                                             |                               |
|                          |                                                               | LC3601 ( $\Delta$ nos $\Delta$ csf)               | 1       | 95/100                            | 21.84              | 23.85 $\pm$ 0.92                           | 22.05 - 25.65                               | 18.42                         |
|                          |                                                               |                                                   | 2       | 85/100                            | 25.06              |                                            |                                             |                               |
|                          |                                                               |                                                   | 3       | 93/100                            | 24.65              |                                            |                                             |                               |
|                          |                                                               | LC3611 ( $\Delta$ nos $\Delta$ bslA $\Delta$ csf) | 1       | 92/100                            | 19.68              | 18.79 $\pm$ 0.63                           | 17.55 - 20.03                               | - 6.70                        |
|                          |                                                               |                                                   | 2       | 96/100                            | 17.99              |                                            |                                             |                               |
|                          |                                                               |                                                   | 3       | 99/100                            | 18.70              |                                            |                                             |                               |
|                          | RG3611 ( $\Delta$ nos $\Delta$ bslA) + RG4010 ( $\Delta$ csf) | 1                                                 | 98/100  | 29.68                             | 29.68 $\pm$ 1.06   | 27.59 - 31.77                              | 47.36                                       |                               |
|                          |                                                               | 2                                                 | 99/100  | 28.64                             |                    |                                            |                                             |                               |
|                          |                                                               | 3                                                 | 100/100 | 30.72                             |                    |                                            |                                             |                               |
|                          | 5b                                                            | OP50 (wt)                                         | 1       | 98/101                            | 20.02              | 18.68 $\pm$ 0.63                           | 17.44 - 19.92                               | control                       |
|                          |                                                               |                                                   | 2       | 95/100                            | 18.81              |                                            |                                             |                               |
|                          |                                                               |                                                   | 3       | 100/100                           | 17.21              |                                            |                                             |                               |
|                          |                                                               | NCIB3610 (wt)                                     | 1       | 100/100                           | 27.98              | 30.10 $\pm$ 0.99                           | 28.15 - 32.05                               | 61.13                         |
|                          |                                                               |                                                   | 2       | 98/100                            | 31.15              |                                            |                                             |                               |
|                          |                                                               |                                                   | 3       | 101/101                           | 31.17              |                                            |                                             |                               |
|                          |                                                               | OP50 + CSF                                        | 1       | 98/102                            | 24.27              | 23.98 $\pm$ 0.94                           | 22.14 - 25.82                               | 28.37                         |
|                          |                                                               |                                                   | 2       | 96/100                            | 23.64              |                                            |                                             |                               |
|                          |                                                               |                                                   | 3       | 101/104                           | 24.03              |                                            |                                             |                               |
| 5c                       | LC3611                                                        | 1                                                 | 100/103 | 17.15                             | 16.06 $\pm$ 1.09   | 13.93 - 18.19                              | control                                     |                               |
|                          |                                                               | 2                                                 | 101/101 | 16.05                             |                    |                                            |                                             |                               |
|                          |                                                               | 3                                                 | 105/105 | 14.98                             |                    |                                            |                                             |                               |
|                          | RG3611                                                        | 1                                                 | 99/100  | 16.85                             | 17.52 $\pm$ 0.94   | 15.55 - 19.49                              | 9.09                                        |                               |
|                          |                                                               | 2                                                 | 96/100  | 17.38                             |                    |                                            |                                             |                               |
|                          |                                                               | 3                                                 | 100/100 | 18.33                             |                    |                                            |                                             |                               |
|                          | LC3611 + CSF                                                  | 1                                                 | 100/101 | 19.26                             | 20.02 $\pm$ 1.00   | 18.48 - 21.56                              | 24.66                                       |                               |
|                          |                                                               | 2                                                 | 95/100  | 21.65                             |                    |                                            |                                             |                               |
|                          |                                                               | 3                                                 | 99/100  | 19.15                             |                    |                                            |                                             |                               |

### Supplementary Table 8. Lifespan analysis related to Figure 5.

The quorum-sensing pentapeptide CSF extends *C. elegans* longevity. Wild-type and isogenic *B. subtilis* mutants strains ( $\Delta$ bslA,  $\Delta$ nos,  $\Delta$ csf,  $\Delta$ nos $\Delta$ csf, or  $\Delta$ nos  $\Delta$ bslA $\Delta$ csf) were used to feed wild-type N2 worms. Each data set consists of three independent repeats fitted to Boltzmann sigmoid curve and the mean survival time  $\pm$  SEM and CI are indicated. Percentage (%) survival change was determined against control OP50 *E. coli* (5a,b) or LC3611 *B. subtilis* (5c) cells, respectively. Independent experimental and control analysis were done side by side and indicated by same number (1, 2, or 3) in the repeat column. Survival data for each treatment, including endogenous (bacterial, 5a) or exogenous CSF treatments (5b,c), were calculated against the correspondent control using Kaplan-Meier test.

| <i>C. elegans</i> strain (genetic background) | Bacterial strain (genetic background) | FUdR | Repeats | Number of dead animals/total | Mean survival (days) | Average of mean survivals $\pm$ S.E.M. (days) | Interval of average survival with 95% (days) | Average survival increase (%) |
|-----------------------------------------------|---------------------------------------|------|---------|------------------------------|----------------------|-----------------------------------------------|----------------------------------------------|-------------------------------|
| N2 (wt)                                       | NCIB3610                              | -    | 1       | 99/100                       | 30.88                | 31.07 $\pm$ 1.13                              | 29.45 - 32.78                                | control                       |
|                                               |                                       | -    | 2       | 98/100                       | 31.36                |                                               |                                              |                               |
|                                               |                                       | -    | 3       | 93/100                       | 31.29                |                                               |                                              |                               |
|                                               | NCIB3610                              | +    | 1       | 89/100                       | 31.27                | 30.90 $\pm$ 0.90                              | 29.14 - 32.67                                | - 0.55                        |
|                                               |                                       | +    | 2       | 87/100                       | 30.95                |                                               |                                              |                               |
|                                               |                                       | +    | 3       | 94/100                       | 30.48                |                                               |                                              |                               |
|                                               | RG3603 ( $\Delta$ <i>bslaA</i> )      | -    | 1       | 99/100                       | 23.76                | 23.26 $\pm$ 2.10                              | 21.16 - 25.36                                | control                       |
|                                               |                                       | -    | 2       | 98/100                       | 22.79                |                                               |                                              |                               |
|                                               |                                       | -    | 3       | 93/100                       | 23.23                |                                               |                                              |                               |
|                                               | RG3603 ( $\Delta$ <i>bslaA</i> )      | +    | 1       | 87/90                        | 22.98                | 23.41 $\pm$ 1.19                              | 22.22 - 24.60                                | 0.65                          |
|                                               |                                       | +    | 2       | 57/59                        | 23.56                |                                               |                                              |                               |
|                                               |                                       | +    | 3       | 63/65                        | 23.69                |                                               |                                              |                               |
|                                               | RG3610 ( $\Delta$ <i>nos</i> )        | -    | 1       | 87/90                        | 25.98                | 26.19 $\pm$ 1.19                              | 22.22 - 24.60                                | control                       |
|                                               |                                       | -    | 2       | 57/59                        | 26.56                |                                               |                                              |                               |
|                                               |                                       | -    | 3       | 63/65                        | 26.69                |                                               |                                              |                               |
|                                               | RG3610 ( $\Delta$ <i>nos</i> )        | +    | 1       | 78/102                       | 26.04                | 26.38 $\pm$ 2.29                              | 24.82 - 29.4                                 | 0.73                          |
|                                               |                                       | +    | 2       | 98/100                       | 27.11                |                                               |                                              |                               |
|                                               |                                       | +    | 3       | 89/104                       | 25.98                |                                               |                                              |                               |
|                                               | RG4010 ( $\Delta$ <i>csf</i> )        | -    | 1       | 62/62                        | 27.38                | 27.18 $\pm$ 2.45                              | 25.29 - 30.19                                | control                       |
|                                               |                                       | -    | 2       | 51/53                        | 27.02                |                                               |                                              |                               |
|                                               |                                       | -    | 3       | 50/50                        | 27.14                |                                               |                                              |                               |
|                                               | RG4010 ( $\Delta$ <i>csf</i> )        | +    | 1       | 87/102                       | 26.98                | 27.14 $\pm$ 2.18                              | 24.95 - 29.32                                | - 0.15                        |
|                                               |                                       | +    | 2       | 99/99                        | 27.11                |                                               |                                              |                               |
|                                               |                                       | +    | 3       | 99/105                       | 27.33                |                                               |                                              |                               |
| CF1038 ( <i>daf-16</i> )                      | NCIB3610                              | -    | 1       | 78/78                        | 17.17                | 17.17 $\pm$ 1.45                              | 15.72 - 18.62                                | control                       |
|                                               |                                       | -    | 2       | 82/82                        | 17.23                |                                               |                                              |                               |
|                                               |                                       | -    | 3       | 81/81                        | 17.12                |                                               |                                              |                               |
|                                               | NCIB3610                              | +    | 1       | 98/100                       | 17.37                | 17.34 $\pm$ 1.98                              | 15.85 - 18.74                                | 0.99                          |
|                                               |                                       | +    | 2       | 72/75                        | 17.44                |                                               |                                              |                               |
|                                               |                                       | +    | 3       | 89/102                       | 17.22                |                                               |                                              |                               |
|                                               | RG3603 ( $\Delta$ <i>bslaA</i> )      | -    | 1       | 62/62                        | 14.85                | 14.69 $\pm$ 1.45                              | 14.12 - 15.36                                | control                       |
|                                               |                                       | -    | 2       | 51/53                        | 14.98                |                                               |                                              |                               |
|                                               |                                       | -    | 3       | 50/50                        | 14.25                |                                               |                                              |                               |
|                                               | RG3603 ( $\Delta$ <i>bslaA</i> )      | +    | 1       | 86/99                        | 13.95                | 14.91 $\pm$ 0.87                              | 14.04 - 15.78                                | 0.15                          |
|                                               |                                       | +    | 2       | 80/99                        | 14.65                |                                               |                                              |                               |
|                                               |                                       | +    | 3       | 100/100                      | 16.13                |                                               |                                              |                               |
|                                               | RG3610 ( $\Delta$ <i>nos</i> )        | -    | 1       | 79/82                        | 26.25                | 26.41 $\pm$ 1.44                              | 29.45 - 32.78                                | control                       |
|                                               |                                       | -    | 2       | 68/68                        | 26.98                |                                               |                                              |                               |

|                         |                          |   |   |         |       |                  |               |         |
|-------------------------|--------------------------|---|---|---------|-------|------------------|---------------|---------|
|                         |                          | - | 3 | 73/80   | 25.99 |                  |               |         |
|                         | RG3610 ( $\Delta nos$ )  | + | 1 | 86/87   | 26.08 | 26.33 $\pm$ 1.76 | 24.57 - 28.09 | - 0.30  |
|                         |                          | + | 2 | 95/95   | 26.48 |                  |               |         |
|                         |                          | + | 3 | 86/87   | 26.43 |                  |               |         |
|                         |                          | - | 1 | 98/100  | 26.78 |                  |               |         |
|                         | RG4010 ( $\Delta csf$ )  | - | 2 | 95/95   | 26.56 | 26.82 $\pm$ 2.45 | 25.02 - 28.68 | control |
|                         |                          | - | 3 | 50/52   | 27.12 |                  |               |         |
|                         |                          | + | 1 | 89/92   | 26.34 |                  |               |         |
|                         | RG4010 ( $\Delta csf$ )  | + | 2 | 95/95   | 26.98 | 26.80 $\pm$ 1.84 | 24.96 - 28.64 | - 0.075 |
|                         |                          | + | 3 | 105/102 | 27.08 |                  |               |         |
|                         |                          | - | 1 | 100/106 | 17.45 |                  |               |         |
|                         | NCIB3610                 | - | 2 | 95/100  | 17.97 | 17.47 $\pm$ 1.34 | 16.45 - 17.78 | control |
|                         |                          | - | 3 | 102/102 | 16.99 |                  |               |         |
|                         |                          | + | 1 | 100/100 | 17.44 |                  |               |         |
|                         | NCIB3610                 | + | 2 | 100/101 | 16.05 | 17.35 $\pm$ 1.17 | 16.18 - 18.52 | - 0.68  |
|                         |                          | + | 3 | 97/99   | 18.56 |                  |               |         |
|                         |                          | - | 1 | 62/62   | 14.35 |                  |               |         |
|                         | RG3603 ( $\Delta bsIA$ ) | - | 2 | 51/53   | 14.89 | 14.68 $\pm$ 1.45 | 13.89 - 15.28 | control |
|                         |                          | - | 3 | 50/50   | 14.80 |                  |               |         |
|                         |                          | + | 1 | 100/102 | 15.18 |                  |               |         |
|                         | RG3603 ( $\Delta bsIA$ ) | + | 2 | 97/100  | 14.69 | 14.72 $\pm$ 1.07 | 13.65 - 15.79 | 0.27    |
|                         |                          | + | 3 | 100/100 | 14.29 |                  |               |         |
|                         |                          | - | 1 | 99/100  | 16.58 |                  |               |         |
| PS3551 ( <i>hsf-1</i> ) | RG3610 ( $\Delta nos$ )  | - | 2 | 98/99   | 16.39 | 16.36 $\pm$ 2.03 | 15.10 - 17.65 | control |
|                         |                          | - | 3 | 101/101 | 16.10 |                  |               |         |
|                         |                          | + | 1 | 100/106 | 18.49 |                  |               |         |
|                         | RG3610 ( $\Delta nos$ )  | + | 2 | 95/100  | 15.94 | 16.21 $\pm$ 1.23 | 14.98 - 17.44 | - 0.92  |
|                         |                          | + | 3 | 102/102 | 15.20 |                  |               |         |
|                         |                          | - | 1 | 74/74   | 16.89 |                  |               |         |
|                         | RG4010 ( $\Delta csf$ )  | - | 2 | 77/78   | 15.99 | 16.47 $\pm$ 1.40 | 15.52 - 17.48 | control |
|                         |                          | - | 3 | 97/97   | 16.54 |                  |               |         |
|                         |                          | + | 1 | 99/100  | 16.64 |                  |               |         |
|                         | RG4010 ( $\Delta csf$ )  | + | 2 | 98/100  | 17.04 | 16.55 $\pm$ 1.01 | 15.35 - 17.75 | 0.49    |
|                         |                          | + | 3 | 100/101 | 15.97 |                  |               |         |

**Supplementary Table 9. The use of 16  $\mu$ M FUdR does not affect N2, *daf-16* and *hsf-1* worm survival fed on wild-type or mutant (RG3603  $\Delta bsIA$ , RG3610  $\Delta nos$ , RG4010  $\Delta csf$ ) *B. subtilis* cells.** Each data set consists of three independent repeats fitted to Boltzmann sigmoid curve and the mean survival time  $\pm$  SEM and CI are indicated. Independent experimental and control analysis were done side by side and indicated by same number (1, 2, or 3) in the repeat column. Survival data for each treatment was calculated against the correspondent control using Kaplan-Meier test.

| COVARIATE      | GENE                | B        | SE      | WALD     | SIGNIFICANCE |
|----------------|---------------------|----------|---------|----------|--------------|
| NO             | <i>nos</i>          | 0.65113  | 0.09154 | 50.5936  | <0.0001      |
| CSF            | <i>csf</i>          | 0.55610  | 0.09113 | 37.2422  | <0.0001      |
| BIOFILM        | <i>bslA</i>         | 0.99936  | 0.08236 | 147.2493 | <0.0001      |
| NO/CSF         | <i>nos-csf</i>      | -0.40379 | 0.15923 | 6.4305   | 0.0112       |
| NO/BIOFILM     | <i>nos-bslA</i>     | -0.24010 | 0.15314 | 2.4581   | 0.1169       |
| BIOFILM/CSF    | <i>nos-csf</i>      | -0.21552 | 0.15280 | 1.9894   | 0.1584       |
| NO/CSF/BIOFILM | <i>nos-csf-bslA</i> | 0.32385  | 0.25167 | 1.6559   | 0.1982       |

| EFFECT OF                                                                                | HAZARD RATIO<br>EXP(B) | 95.0 % CI for<br><u>LOW</u> to <u>HIGH</u> |
|------------------------------------------------------------------------------------------|------------------------|--------------------------------------------|
| BIOFILM DEFICIENCY<br>( $\Delta bslA$ )                                                  | 2.45                   | 2.18 to 2.75                               |
| NO DEFICIENCY<br>( $\Delta nos$ )<br>when <i>csf</i> ACTIVE<br>when <i>csf</i> INACTIVE  | 1.76<br>1.31           | 1.52 to 2.03<br>1.08 to 1.59               |
| CSF DEFICIENCY<br>( $\Delta csf$ )<br>when <i>nos</i> ACTIVE<br>when <i>nos</i> INACTIVE | 1.61<br>1.20           | 1.40 to 1.86<br>0.99 to 1.46               |

**Supplementary Table 10.** Semiparametric Cox regression analysis<sup>1-3</sup> of *B. subtilis* genes that positively affect *C. elegans* survival. The time until death of worms (n = 300 worms per each lifespan experiment) fed on *B. subtilis*



cells harboring active (present) or inactive (absent) genes promoting worm longevity (covariates, *nos*, *csf*, *bslA*, *nos-csf*, *bslA-nos*, *csf-bslA* and *nos-csf-bslA*) was analyzed using Cox regression. B is the unstandardized regression coefficient and its standard error (SE), its Wald test significance value (Wald), and the significance determined when the other covariates were set to their mean values. Hazard ratio,  $\text{Exp}(B)$ , for the categorical covariates of interest is the risk of worm death relative to the control case-controlling for other covariates<sup>1-3</sup>. The 95% confidential interval (CI) of the hazard ratio is indicated.

| <i>C. elegans</i> strain | Relative to figure | Bacterial strain (genetic background) | Status | Repeats | Number of animals that died/total | Mean survival days | Average of means survival days $\pm$ S.E.M. | Interval of average survival days with 95 % | Average survival increase (%) |
|--------------------------|--------------------|---------------------------------------|--------|---------|-----------------------------------|--------------------|---------------------------------------------|---------------------------------------------|-------------------------------|
| N2                       | S6                 | OP50                                  | live   | 1       | 50/51                             | 21.22              | $20.51 \pm 0.59$                            | 19.35 - 21.67                               | control                       |
|                          |                    |                                       |        | 2       | 30/32                             | 19.25              |                                             |                                             |                               |
|                          |                    |                                       |        | 3       | 27/29                             | 21.16              |                                             |                                             |                               |
|                          |                    |                                       | dead   | 1       | 45/48                             | 25.16              | $24.73 \pm 0.76$                            | 23.23 - 26.23                               | 20.58                         |
|                          |                    |                                       |        | 2       | 25/30                             | 24.08              |                                             |                                             |                               |
|                          |                    |                                       |        | 3       | 36/40                             | 24.95              |                                             |                                             |                               |
|                          |                    | NCIB3610                              | live   | 1       | 100/102                           | 29.86              | $30.10 \pm 0.99$                            | 28.15 - 32.05                               | control                       |
|                          |                    |                                       |        | 2       | 106/107                           | 30.23              |                                             |                                             |                               |
|                          |                    |                                       |        | 3       | 92/92                             | 30.21              |                                             |                                             |                               |
|                          |                    |                                       | dead   | 1       | 42/43                             | 25.14              | $25.79 \pm 0.8$                             | 24.22 - 27.36                               | - 14.32                       |
|                          |                    |                                       |        | 2       | 30/33                             | 26.12              |                                             |                                             |                               |
|                          |                    |                                       |        | 3       | 25/25                             | 26.11              |                                             |                                             |                               |

**Supplementary Table 11. Lifespan analysis related to Supplementary Figure 6.**

Only alive *B. subtilis* cells are able to prolong *C. elegans* longevity. Each data set consists of three independent repeats fitted to Boltzmann sigmoid curve and the mean survival time  $\pm$  SEM and CI are indicated. Percentage (%) survival change of worms fed on dead OP50 *E. coli* cells or dead NCIB3610 *B. subtilis* cells was determined against control worms fed on live OP50 *E. coli* cells or live NCIB3610 *B. subtilis* cells, respectively. Independent experimental and control analysis were done side by side and indicated by same number (1, 2, or 3) in the repeat column. Survival data were calculated by Kaplan-Meier test.

| <i>C. elegans</i> strain | Related to figure | Bacterial strain (genetic background) | Repeats | Number of animals that died/total | Mean survival days | Average of mean survival days $\pm$ S.E.M. | Interval of average survival days with 95 % | Average survival increase (%) / P value |
|--------------------------|-------------------|---------------------------------------|---------|-----------------------------------|--------------------|--------------------------------------------|---------------------------------------------|-----------------------------------------|
| CF1038 ( <i>daf-16</i> ) | 6a                | OP50 (wt)                             | 1       | 80/81                             | 13.83              | 13.87 $\pm$ 0.52                           | 12.85 - 14.89                               | control                                 |
|                          |                   |                                       | 2       | 96/96                             | 13.88              |                                            |                                             |                                         |
|                          |                   |                                       | 3       | 90/92                             | 13.90              |                                            |                                             |                                         |
|                          |                   | NCIB3610 (wt)                         | 1       | 77/78                             | 17.17              | 17.17 $\pm$ 0.74                           | 15.72 - 18.62                               | 23.79 / 0.00005                         |
|                          |                   |                                       | 2       | 82/82                             | 17.23              |                                            |                                             |                                         |
|                          |                   |                                       | 3       | 75/81                             | 17.12              |                                            |                                             |                                         |
|                          |                   | JH642 (wt)                            | 1       | 80/80                             | 15.43              | 15.60 $\pm$ 0.68                           | 14.27 - 16.93                               | 12.47 / 0.098                           |
|                          |                   |                                       | 2       | 80/84                             | 15.70              |                                            |                                             |                                         |
|                          |                   |                                       | 3       | 105/114                           | 15.68              |                                            |                                             |                                         |
| PS3551 ( <i>hsf-1</i> )  | 6b                | OP50                                  | 1       | 80/80                             | 10.86              | 11.97 $\pm$ 0.58                           | 10.83 - 13.11                               | control                                 |
|                          |                   |                                       | 2       | 82/82                             | 12.05              |                                            |                                             |                                         |
|                          |                   |                                       | 3       | 90/90                             | 13.00              |                                            |                                             |                                         |
|                          |                   | NCIB3610                              | 1       | 80/80                             | 17.95              | 16.25 $\pm$ 0.60                           | 15.08 - 17.42                               | 35.76 / 0                               |
|                          |                   |                                       | 2       | 70/70                             | 16.32              |                                            |                                             |                                         |
|                          |                   |                                       | 3       | 76/78                             | 14.48              |                                            |                                             |                                         |
|                          |                   | JH642                                 | 1       | 84/84                             | 14.17              | 13.85 $\pm$ 0.56                           | 12.76 - 14.94                               | 15.71 / 0.0011                          |
|                          |                   |                                       | 2       | 80/80                             | 13.71              |                                            |                                             |                                         |
|                          |                   |                                       | 3       | 85/86                             | 13.67              |                                            |                                             |                                         |

**Supplementary Table 12. Lifespan analysis related to Figure 6.**

The transcription factors DAF-16 and HSF-1 are necessary for the prolongevity effect of *B. subtilis* on *C. elegans*. Each data set consists of three independent repeats fitted to Boltzmann sigmoid curve and the mean survival time  $\pm$ SEM and CI are indicated. Percentage (%) survival change of wild-type (N2), *daf-16* (CF1038) or *hsf-1* (PS3551) worms fed on wild-type domesticated (JH642) or undomesticated (NCIB3610) *B. subtilis* cells was determined against worms (wild-type, *daf-16* or *hsf-1*) fed on control OP50 *E. coli* cells. Independent experimental and control analysis were done side by side and indicated by same number (1, 2, or 3) in the repeat column. P-values for each treatment were calculated against the correspondent control by Log-rank test. Survival data were calculated using Kaplan-Meier test.

| <i>C. elegans</i> strain | Related to figure | Bacterial strain (genetic background) | Repeats | Number of animals that died/total | Mean survival days | Average of mean survival days ± S.E.M. | Interval of average survival days with 95 % | Average survival increase (%) / P value |
|--------------------------|-------------------|---------------------------------------|---------|-----------------------------------|--------------------|----------------------------------------|---------------------------------------------|-----------------------------------------|
| N2                       | 7a                | NCIB3610 (wt)                         | 1       | 100/102                           | 29.86              | 30.10 ± 0.99                           | 28.15 - 32.05                               | control                                 |
|                          |                   |                                       | 2       | 106/107                           | 30.23              |                                        |                                             |                                         |
|                          |                   |                                       | 3       | 92/92                             | 30.21              |                                        |                                             |                                         |
|                          |                   | RG3603 ( $\Delta$ <i>bsIA</i> )       | 1       | 93/94                             | 23.16              | 22.17 ± 0.56                           | 21.07 - 23.27                               | - 26.35 / 0                             |
|                          |                   |                                       | 2       | 95/95                             | 22.00              |                                        |                                             |                                         |
|                          |                   |                                       | 3       | 96/96                             | 21.35              |                                        |                                             |                                         |
|                          |                   | RG3610 ( $\Delta$ <i>nos</i> )        | 1       | 86/87                             | 26.08              | 26.33 ± 0.90                           | 24.57 - 28.09                               | - 12.52 / 0.0016                        |
|                          |                   |                                       | 2       | 95/95                             | 26.48              |                                        |                                             |                                         |
|                          |                   |                                       | 3       | 86/87                             | 26.43              |                                        |                                             |                                         |
|                          |                   | RG4010 ( $\Delta$ <i>csf</i> )        | 1       | 100/100                           | 26.34              | 26.80 ± 0.94                           | 24.96 - 28.64                               | - 10.96 / 0.0037                        |
|                          |                   |                                       | 2       | 100/100                           | 26.98              |                                        |                                             |                                         |
|                          |                   |                                       | 3       | 105/102                           | 27.08              |                                        |                                             |                                         |
| CF1038 ( <i>daf-16</i> ) | 7b                | NCIB3610                              | 1       | 98/100                            | 17.89              | 17.55 ± 0.74                           | 16.48 - 18.62                               | control                                 |
|                          |                   |                                       | 2       | 94/100                            | 17.34              |                                        |                                             |                                         |
|                          |                   |                                       | 3       | 97/101                            | 17.42              |                                        |                                             |                                         |
|                          |                   | RG3603                                | 1       | 86/99                             | 13.95              | 14.91 ± 0.44                           | 14.04 - 15.78                               | - 15.04 / 0.00000002                    |
|                          |                   |                                       | 2       | 80/99                             | 14.65              |                                        |                                             |                                         |
|                          |                   |                                       | 3       | 100/100                           | 16.13              |                                        |                                             |                                         |
|                          |                   | RG3610                                | 1       | 99/99                             | 15.89              | 15.85 ± 0.5                            | 14.67 - 17.03                               | - 9.69 / 0.307                          |
|                          |                   |                                       | 2       | 98/109                            | 15.38              |                                        |                                             |                                         |
|                          |                   |                                       | 3       | 100/100                           | 16.28              |                                        |                                             |                                         |
|                          |                   | RG4010                                | 1       | 96/99                             | 15.68              | 16.37 ± 0.59                           | 15.20 - 17.54                               | - 6.72 / 0.545                          |
|                          |                   |                                       | 2       | 100/100                           | 17.85              |                                        |                                             |                                         |
|                          |                   |                                       | 3       | 100/101                           | 15.58              |                                        |                                             |                                         |
| PS3551 ( <i>hsf-1</i> )  | 7c                | NCIB3610                              | 1       | 100/100                           | 17.44              | 17.35 ± 0.50                           | 16.18 - 18.52                               | control                                 |
|                          |                   |                                       | 2       | 100/101                           | 16.05              |                                        |                                             |                                         |
|                          |                   |                                       | 3       | 97/99                             | 18.56              |                                        |                                             |                                         |
|                          |                   | RG3603                                | 1       | 100/102                           | 15.18              | 14.72 ± 0.55                           | 13.65 - 15.79                               | - 15.16 / 0.038                         |
|                          |                   |                                       | 2       | 97/100                            | 14.69              |                                        |                                             |                                         |
|                          |                   |                                       | 3       | 100/100                           | 14.29              |                                        |                                             |                                         |
|                          |                   | RG3610                                | 1       | 100/106                           | 18.49              | 16.21 ± 0.63                           | 14.98 - 17.44                               | - 6.57 / 0.1907                         |
|                          |                   |                                       | 2       | 95/100                            | 15.94              |                                        |                                             |                                         |
|                          |                   |                                       | 3       | 102/102                           | 15.20              |                                        |                                             |                                         |
|                          |                   | RG4010                                | 1       | 99/100                            | 16.64              | 16.55 ± 0.61                           | 15.35 - 17.75                               | - 4.61 / 0.3124                         |
|                          |                   |                                       | 2       | 98/100                            | 17.04              |                                        |                                             |                                         |
|                          |                   |                                       | 3       | 100/101                           | 15.97              |                                        |                                             |                                         |

### Supplementary Table 13. Lifespan analysis related to Figure 7.

Each *B. subtilis* pro longevity property (NO/CSF production and biofilm formation proficiency) requires DAF-16 and HSF-1 functionality. The showed data set consists of three independent repeats fitted to Boltzmann sigmoid curve and the mean survival time ± SEM, *p*-value and CI are indicated. Percentage (%) survival change of wild-type (N2), *daf-16* (CF1038) or *hsf-1* (PS3551) worms fed on the different *B. subtilis* mutant cells ( $\Delta$ *bsIA*,  $\Delta$ *nos*, or  $\Delta$ *csf*) was determined against worms (wild-type, *daf-16* or *hsf-1*) fed on control NCIB3610 (wild-type) *B. subtilis* cells. Independent experimental and control analysis were done side by side and indicated by same number (1, 2, or 3) in the repeat column. *P*-values for each treatment were calculated against the correspondent control by Log-rank test. Survival data were calculated using Kaplan-Meier test.

| <i>C. elegans</i> strain      | Related to figure | Bacterial strain (genetic background) | Repeats | Number of animals that died/total | Mean survival days | Average of mean survival days $\pm$ S.E.M. | Interval of average survival days with 95 % | Average survival increase (%) / P value |
|-------------------------------|-------------------|---------------------------------------|---------|-----------------------------------|--------------------|--------------------------------------------|---------------------------------------------|-----------------------------------------|
| CB1370 ( <i>daf-2/e1370</i> ) | 8a                | OP50 (wt)                             | 1       | 79/80                             | 32.7               | 31.82 $\pm$ 1.68                           | 28.84 -35.10                                | control                                 |
|                               |                   |                                       | 2       | 97/98                             | 31.37              |                                            |                                             |                                         |
|                               |                   |                                       | 3       | 100/106                           | 31.38              |                                            |                                             |                                         |
|                               |                   | NCIB3610 (wt)                         | 1       | 74/74                             | 37.62              | 34.84 $\pm$ 1.81                           | 31.26 - 38.39                               | 9.49 / 0.663                            |
|                               |                   |                                       | 2       | 77/78                             | 37.74              |                                            |                                             |                                         |
|                               |                   |                                       | 3       | 97/97                             | 32.16              |                                            |                                             |                                         |

**Supplementary Table 14. Lifespan analysis related to Figure 8.**

The prolongevity effect of *B. subtilis* on worm survival requires an active insulin-like signaling pathway. *daf-2* (CB1370) worms were grown at 15 °C with OP50 *E. coli* cells as food source until worms reached late L4/young adult stage. At this developmental time worms were taken, washed and shifted to 20 °C in the presence of OP50 *E. coli* cells or NCIB3610 *B. subtilis* cells as new food sources. The average survival increase was determined considering worms fed on OP50 *E. coli* cells as control. Each data set consists of three independent repeats fitted to Boltzmann sigmoid curve and the mean survival time  $\pm$  SEM, *p*-value and CI are indicated. Independent experimental and control analysis were done side by side and indicated by same number (1, 2, or 3) in the repeat column. *P*-values for each treatment were calculated against the correspondent control by Log-rank test. Survival data were calculated using Kaplan-Meier test.
